# Supplementary material
Source: PubMed Central journal article supplement (PMC3596854)
Supplement: supp_dds561_dds561supp.pdf [file supp_dds561_dds561supp.pdf]

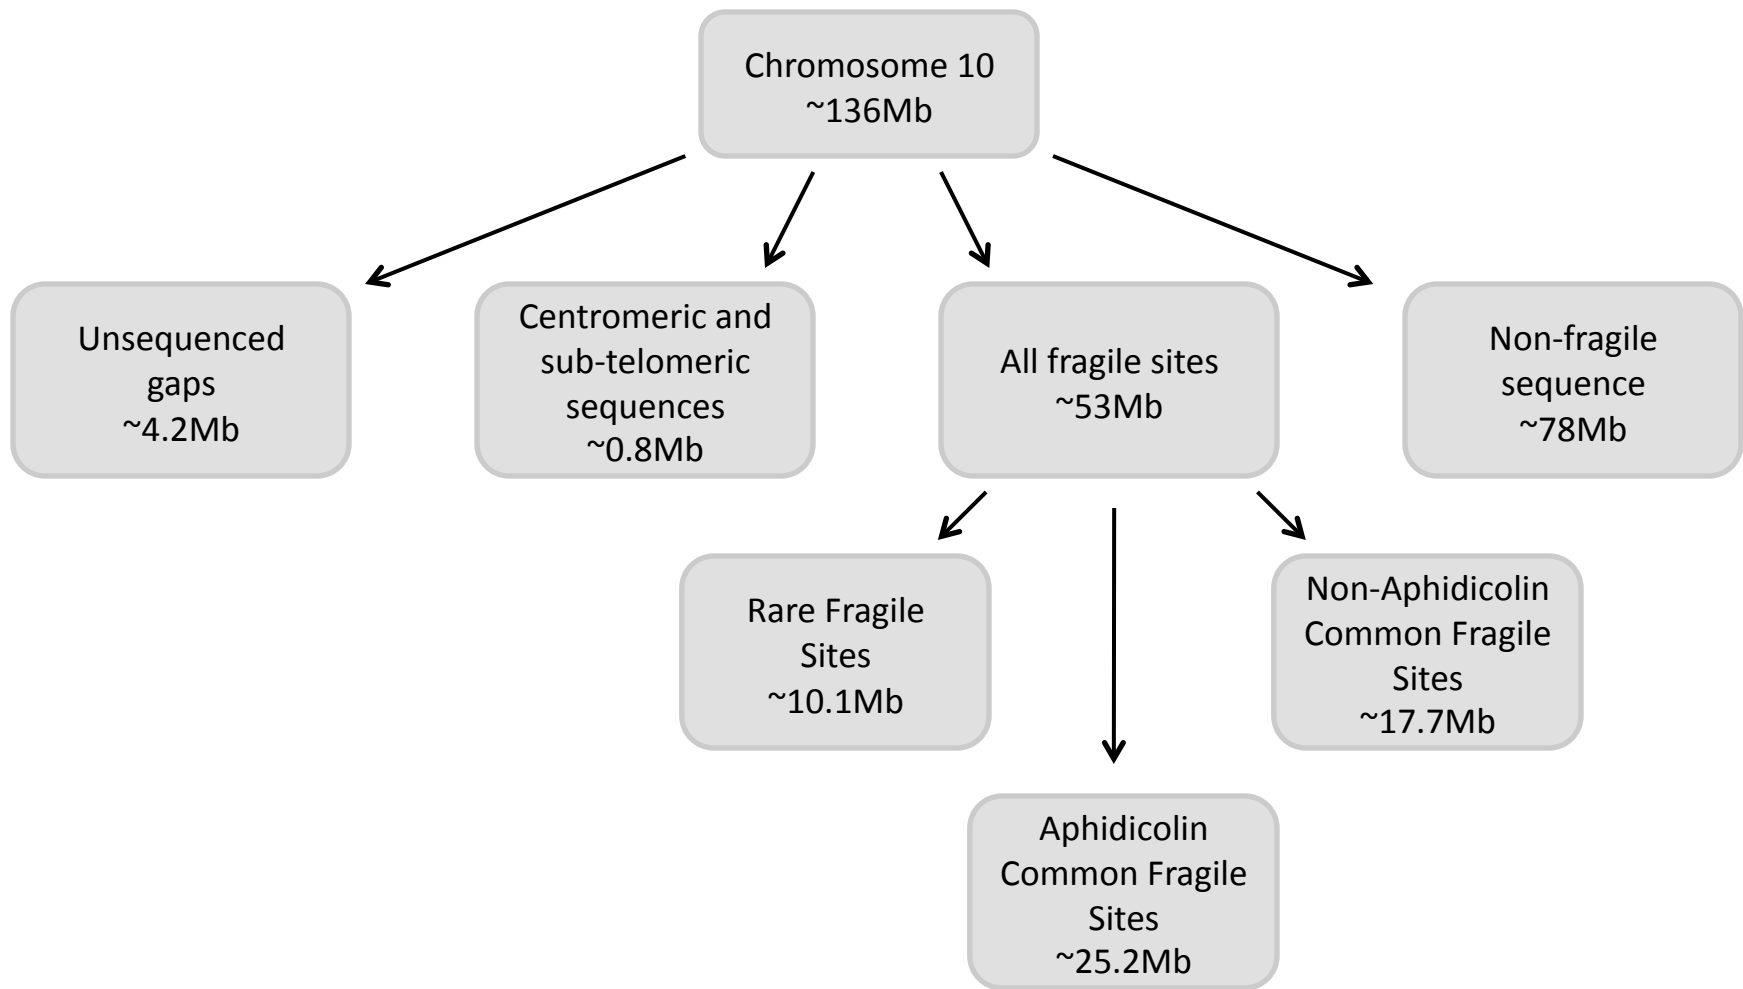

**Figure S1.** Division of the chromosome 10 sequence into non-fragile and fragile regions.

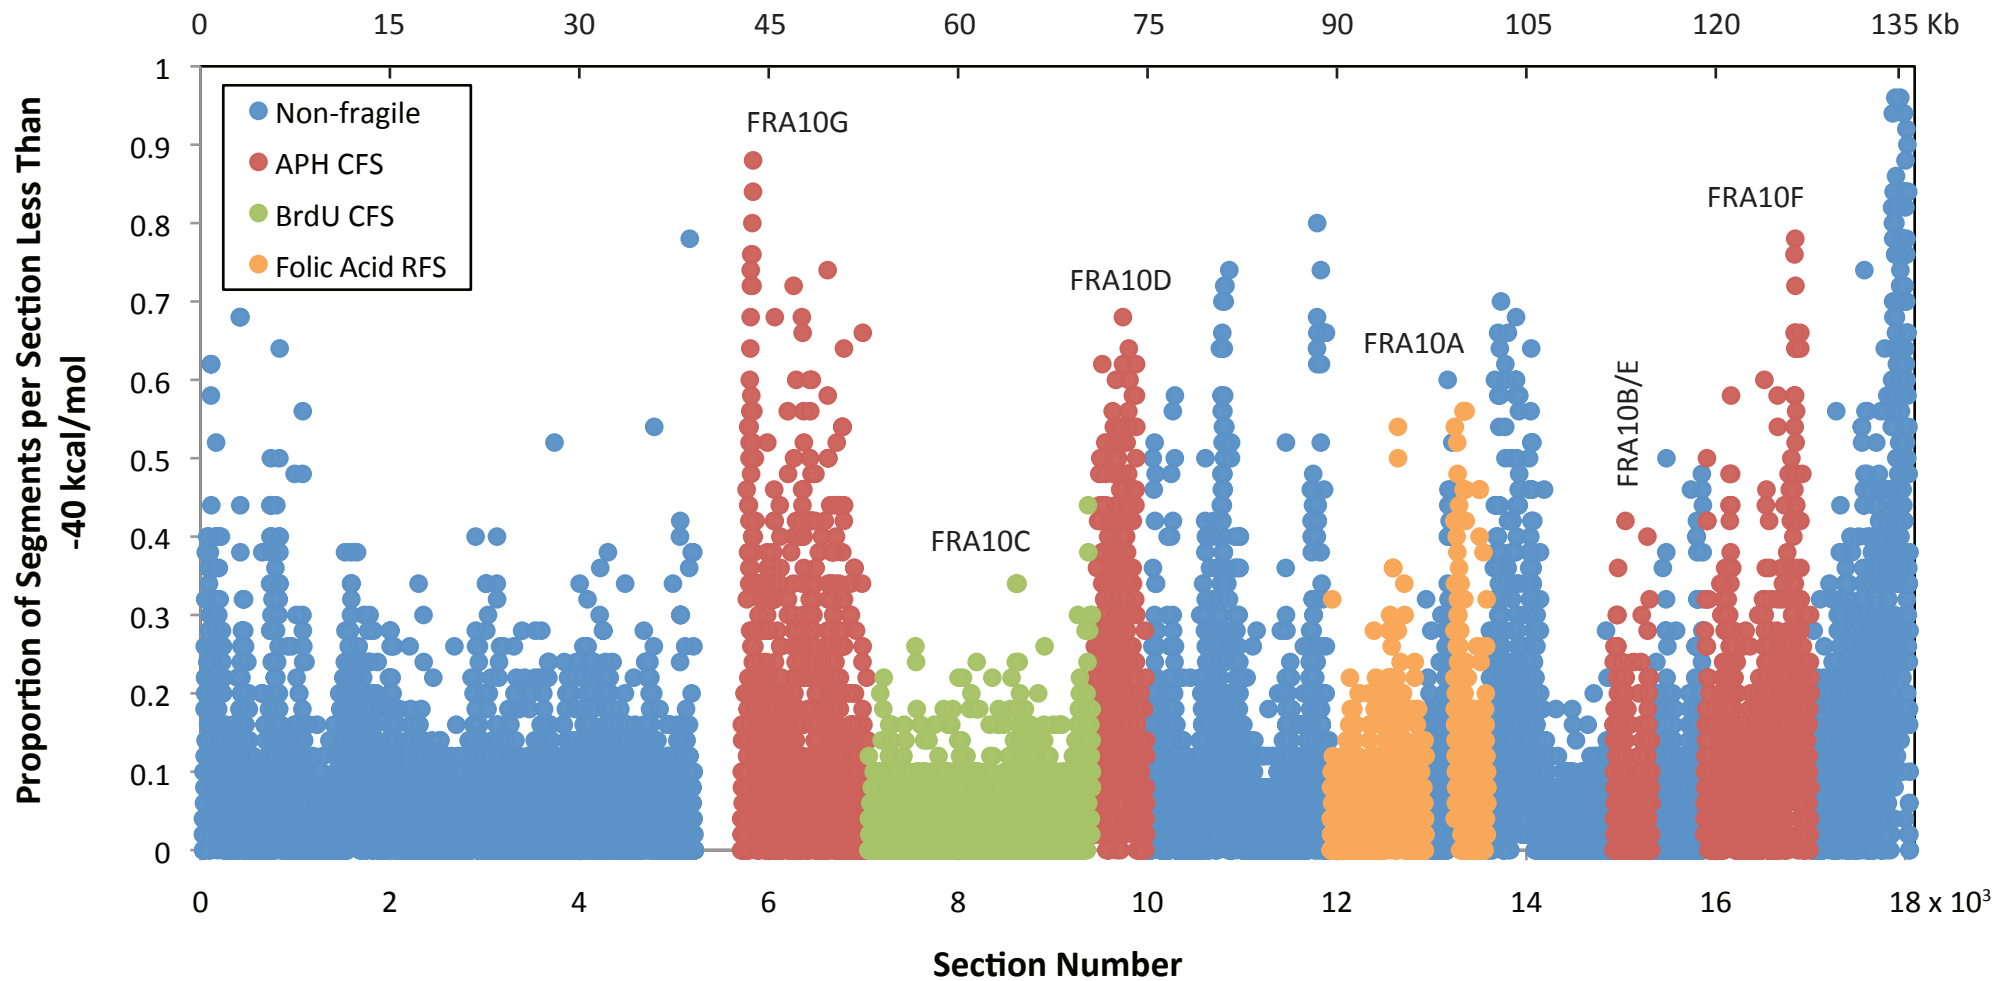

**Figure S2.** Density of Secondary Structure Forming Potential on Chromosome 10. The proportion of segments per section (consisting of 50 segments) with a predicted free energy value less than -40 kcal/mol is depicted for chromosome 10, where each data point represents 7650-nt. APH-induced common fragile sites (CFS) have high levels of DNA secondary structure clustering. BrdU-induced common fragile site FRA10C has low levels of clustering compared to the overall sequence. Folic acid rare fragile site (RFS) FRA10A has low levels of clustering in the 5' half and higher levels in the 3' section. Non-fragile DNA exhibits fluctuations in regions with low and high levels of clustering, with increasingly high levels of clustering approaching the 3' telomere.

A.FRA3B

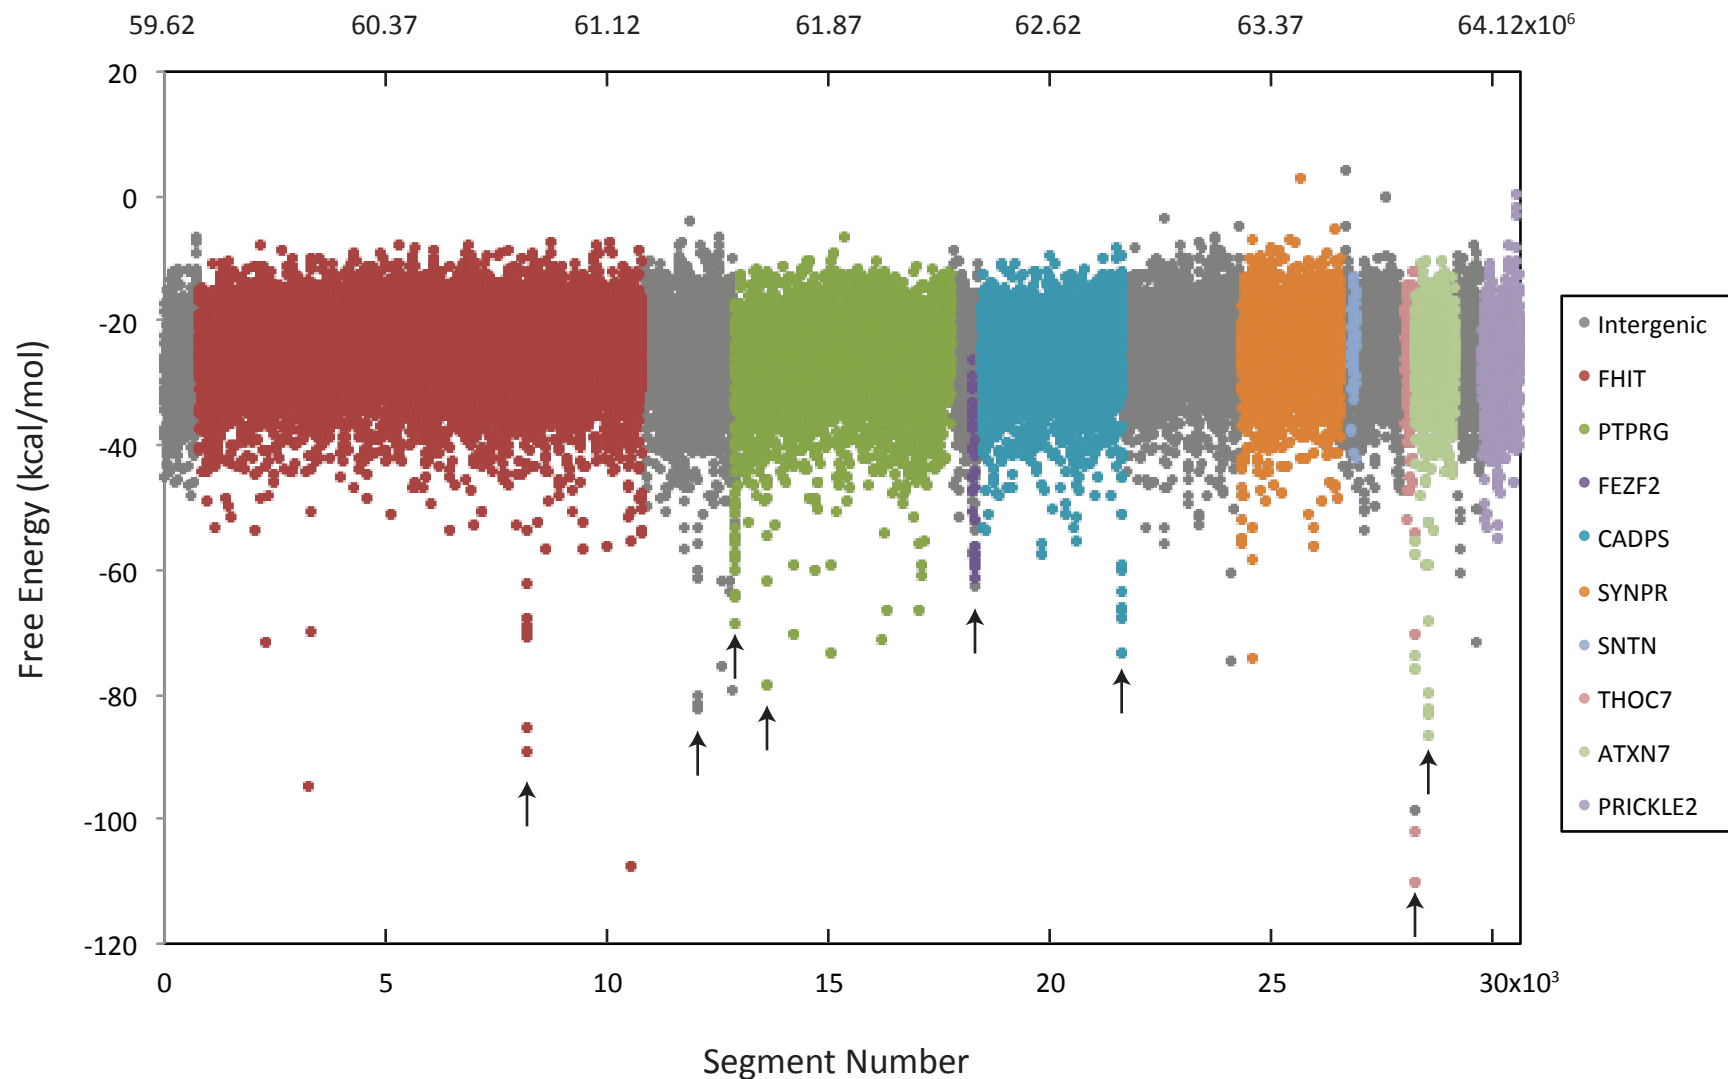

**Figure S3.** Free energy values for predicted DNA secondary structures at FRA3B (A) and FRA16D (B). The free energy value for the most favorable Mfold-predicted DNA secondary structure for each 300-nt segment, with 150-nt increments, of the FRA3B and FRA16D sequences is presented. The lower x axis depicts the segment number in the p to q arm direction on each chromosome, the upper x axis depicts the corresponding nucleotide number, and the y axis displays the free energy value of the predicted structure. The arrows indicate the regions identified by the fragility threshold.

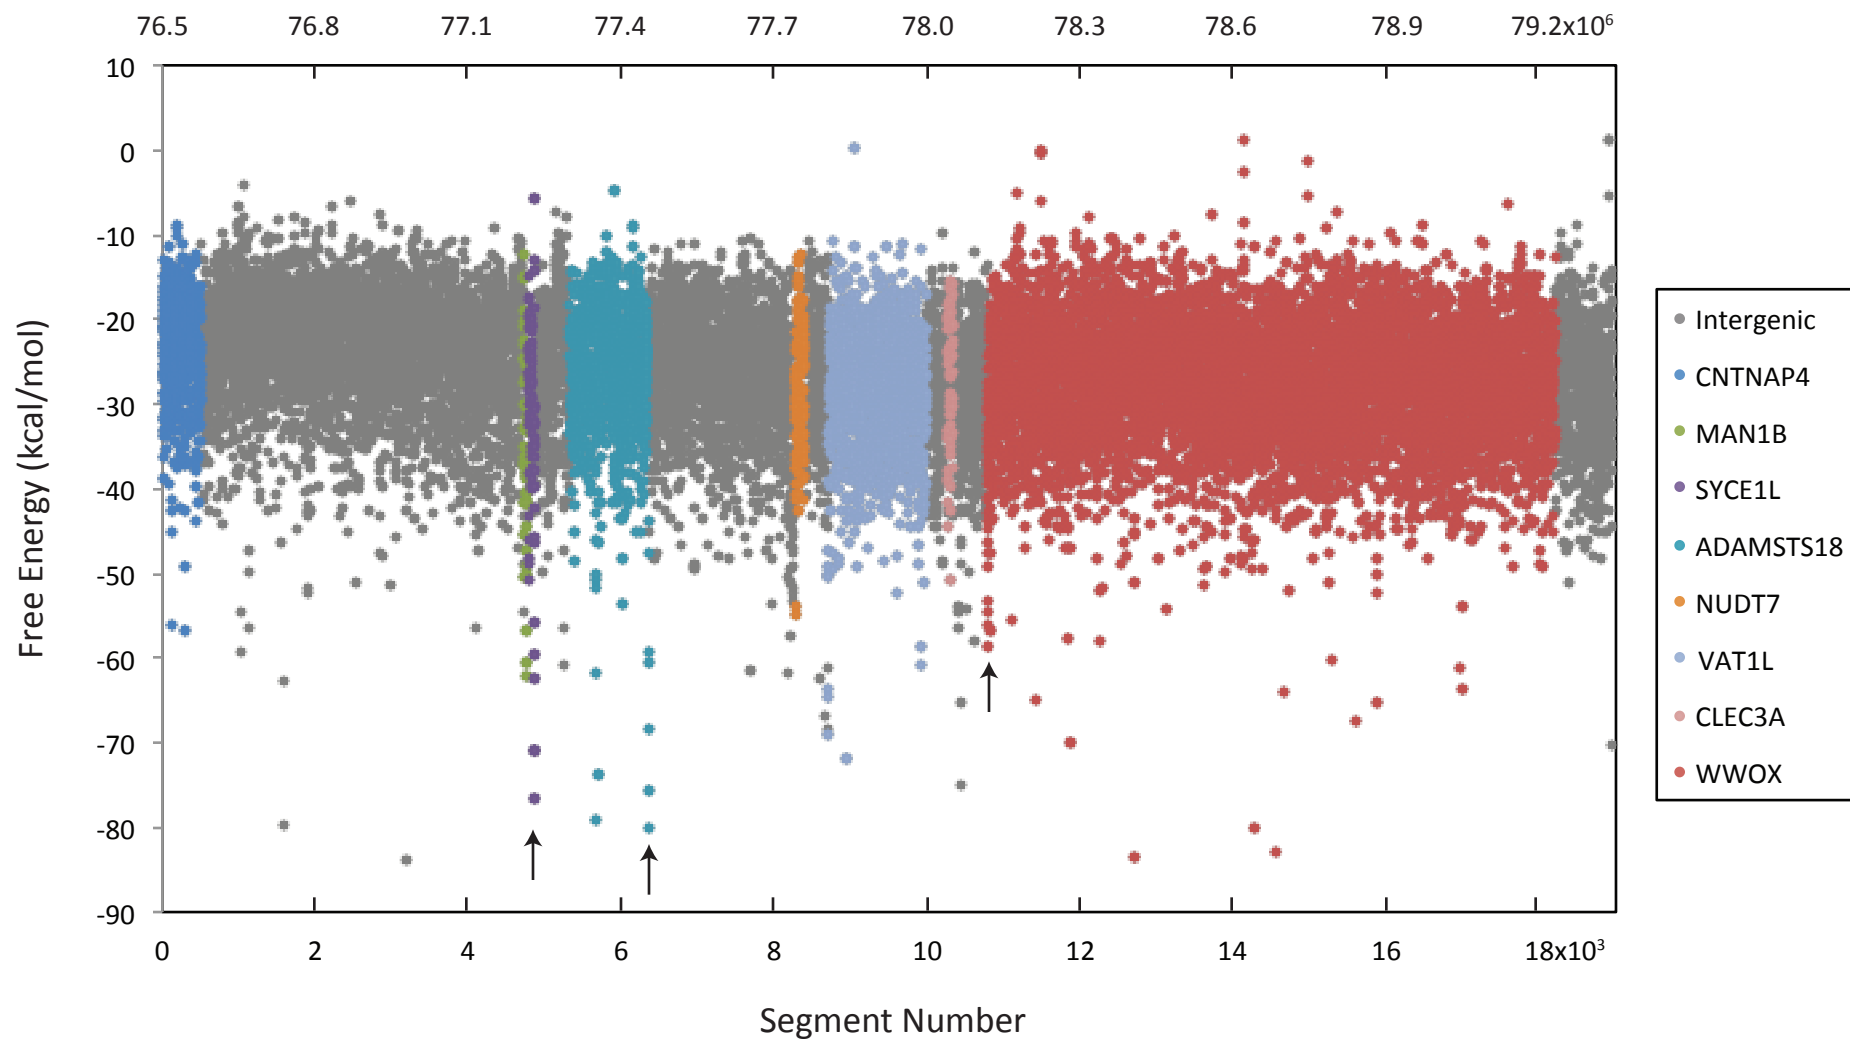**Figure S3.** (Continued)



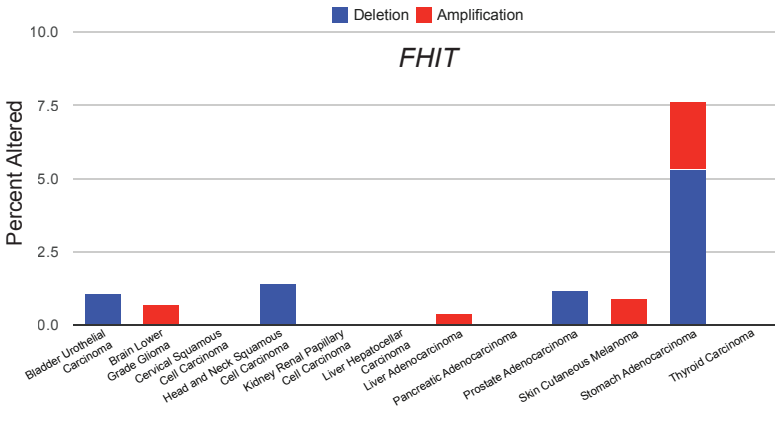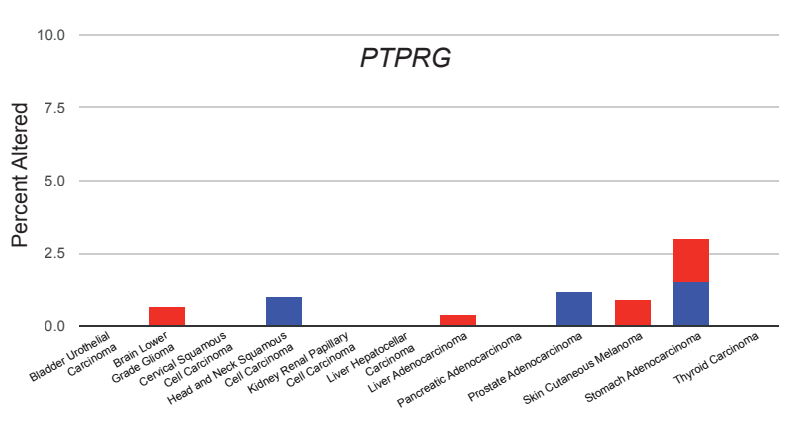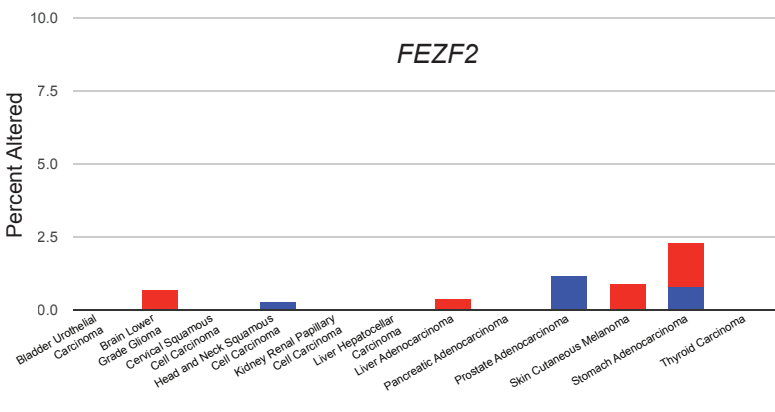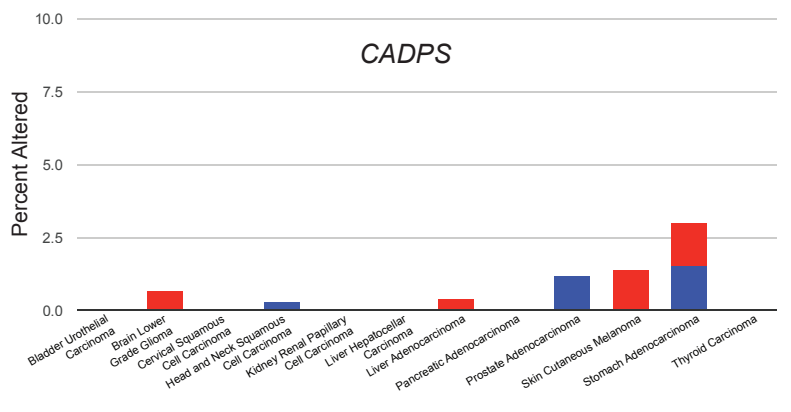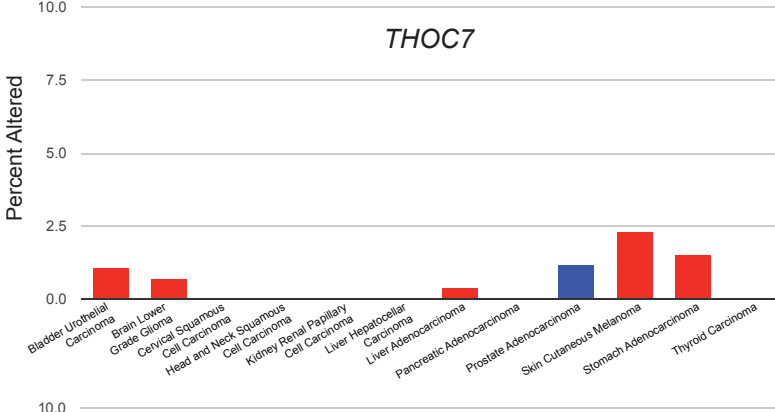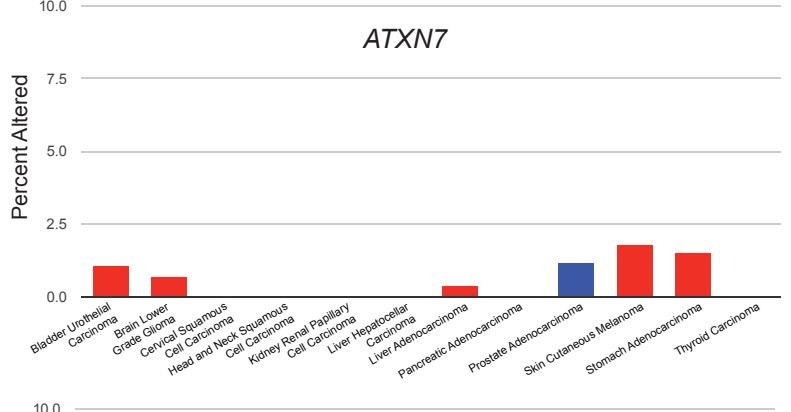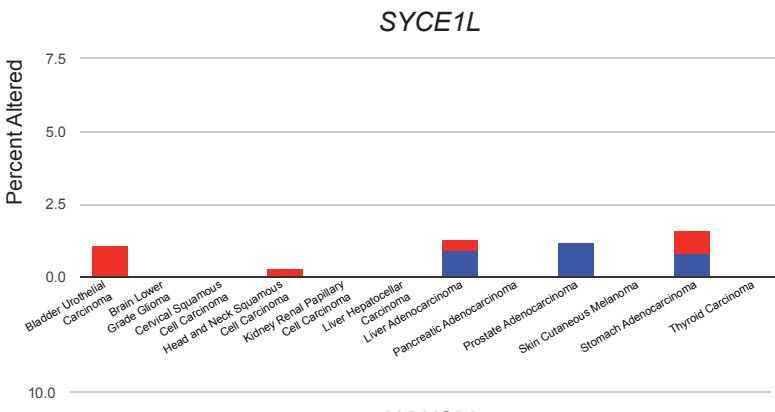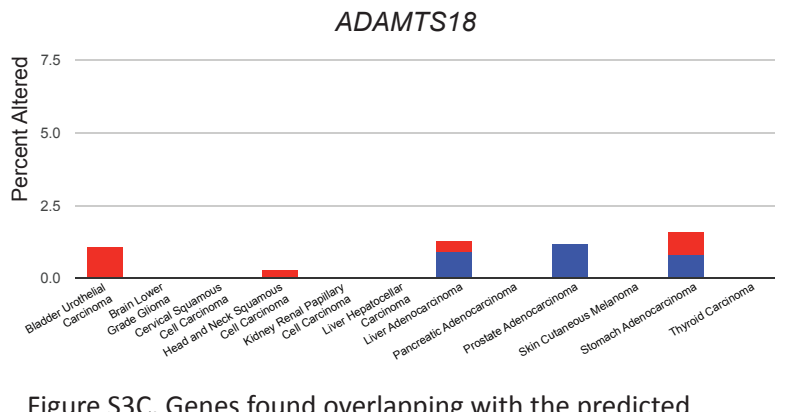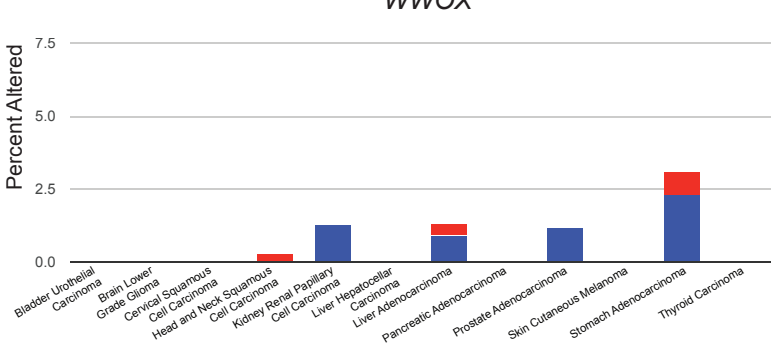

Figure S3C. Genes found overlapping with the predicted fragile regions in FRA3B (FHIT, PTPRG, FEZF2, CADPS, THOC7, and ATXN7), and FRA16D (SYCE1L, ADAMTS18, and WWOX) are shown as the percent of deletions (blue) and amplifications (red) from the cBio Cancer Genomics Portal, which contains data for 7848 tumor samples from 26 cancer studies (73).

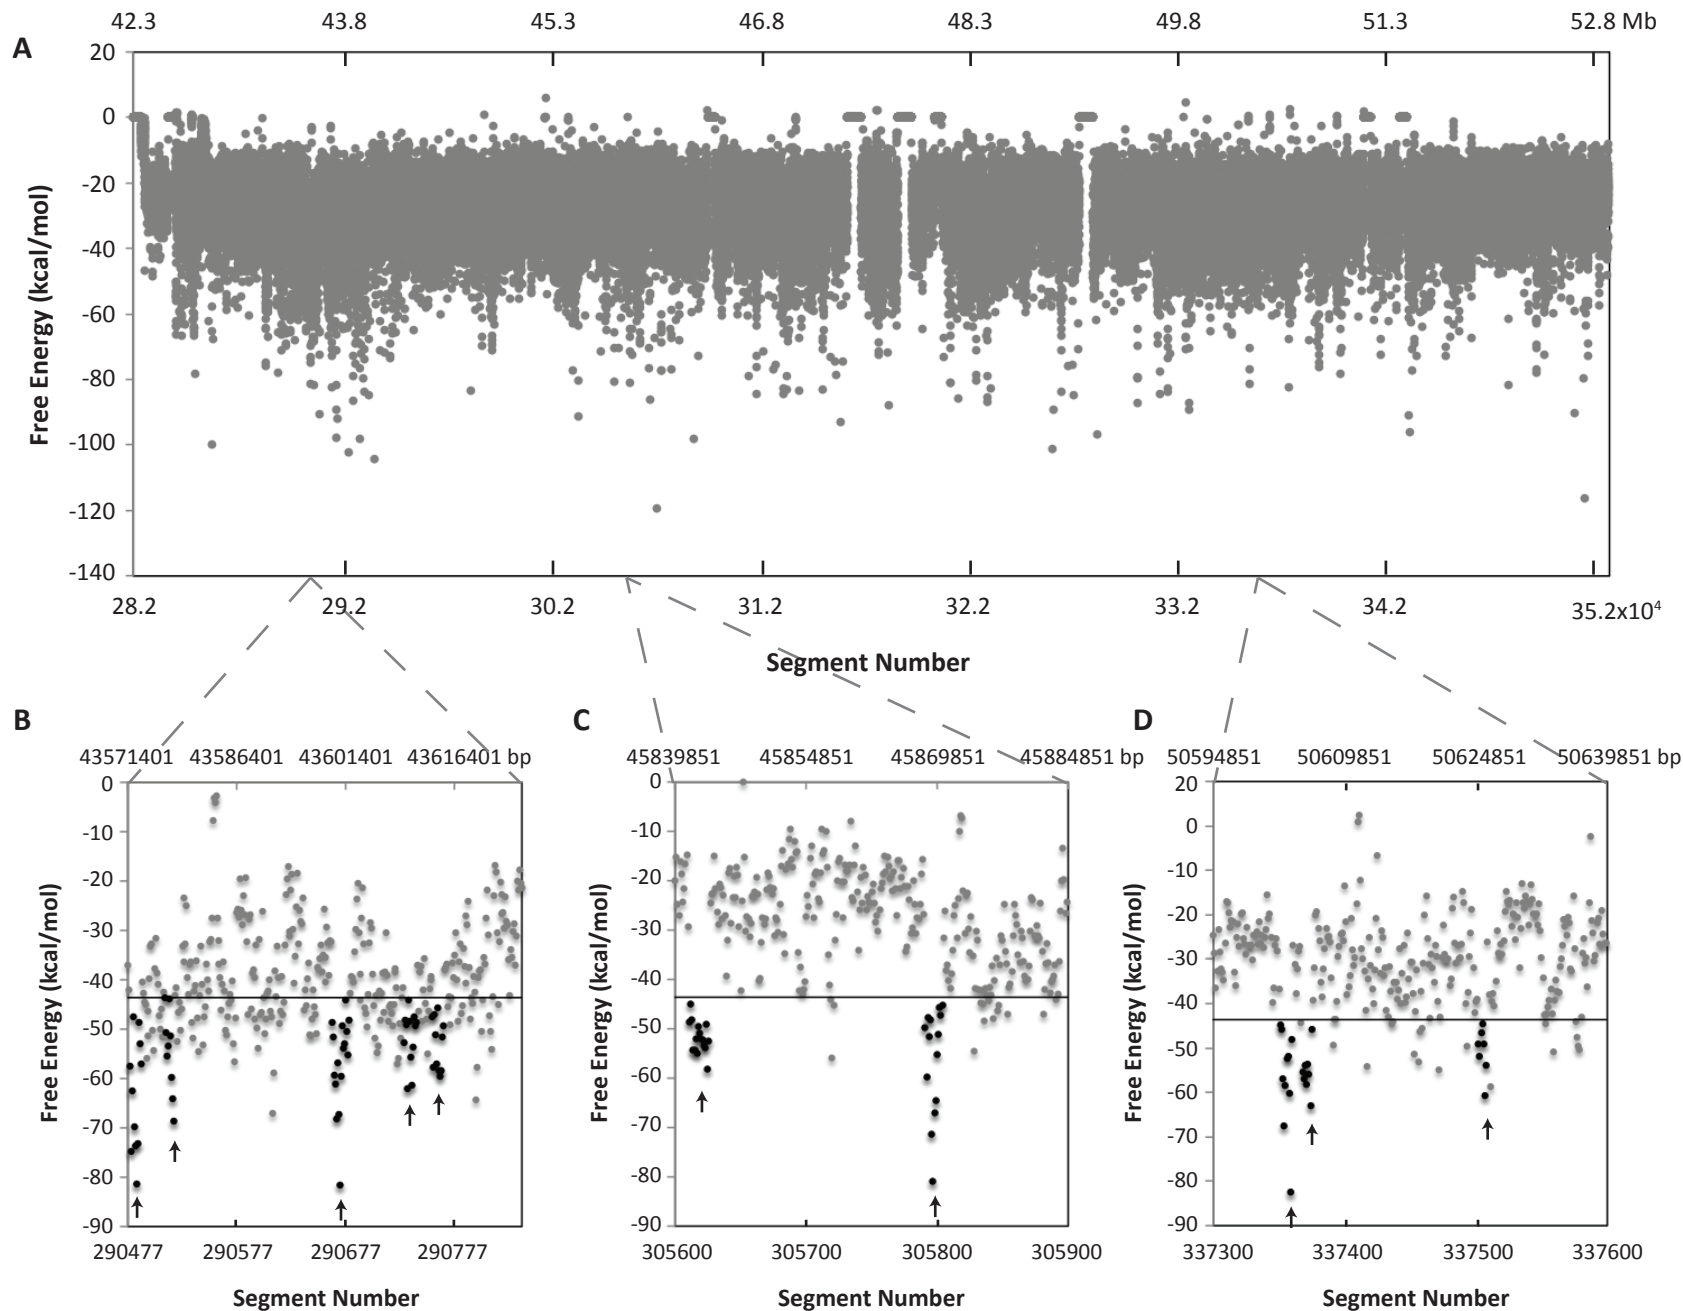

**Figure S4.** Free energy values for predicted DNA secondary structures at FRA10G. (A) The free energy value for the most favorable Mfold-predicted DNA secondary structure for each 300-nt segment, with 150-nt increments, of the FRA10G sequence is presented. The lower x axis depicts the segment number in the p to q arm direction on chromosome 10, the upper x axis depicts the corresponding nucleotide number, and the y axis displays the free energy value of the predicted structure. A zoomed in view of three sequence regions are presented in panels B-D, and their relative location in FRA10G is shown by the dashed lines. The 95% confidence interval for chromosome 10 (-43.61 kcal/mol) is depicted by the horizontal black line. Regions (black dots, arrows) predicted to be fragile using the prediction threshold- seven consecutive segments below -43.61 kcal/mol, exhibit sharp decreases in predicted free energy values compared to the surrounding sequence (grey dots). These fragile regions correspond to both genic and intergenic sequences: (B) five regions located within RET, (C) one intergenic region (nt 45,868501~45844050) and one region within ALOX5 (nt 45868501~45870750), and (D) three intergenic regions.

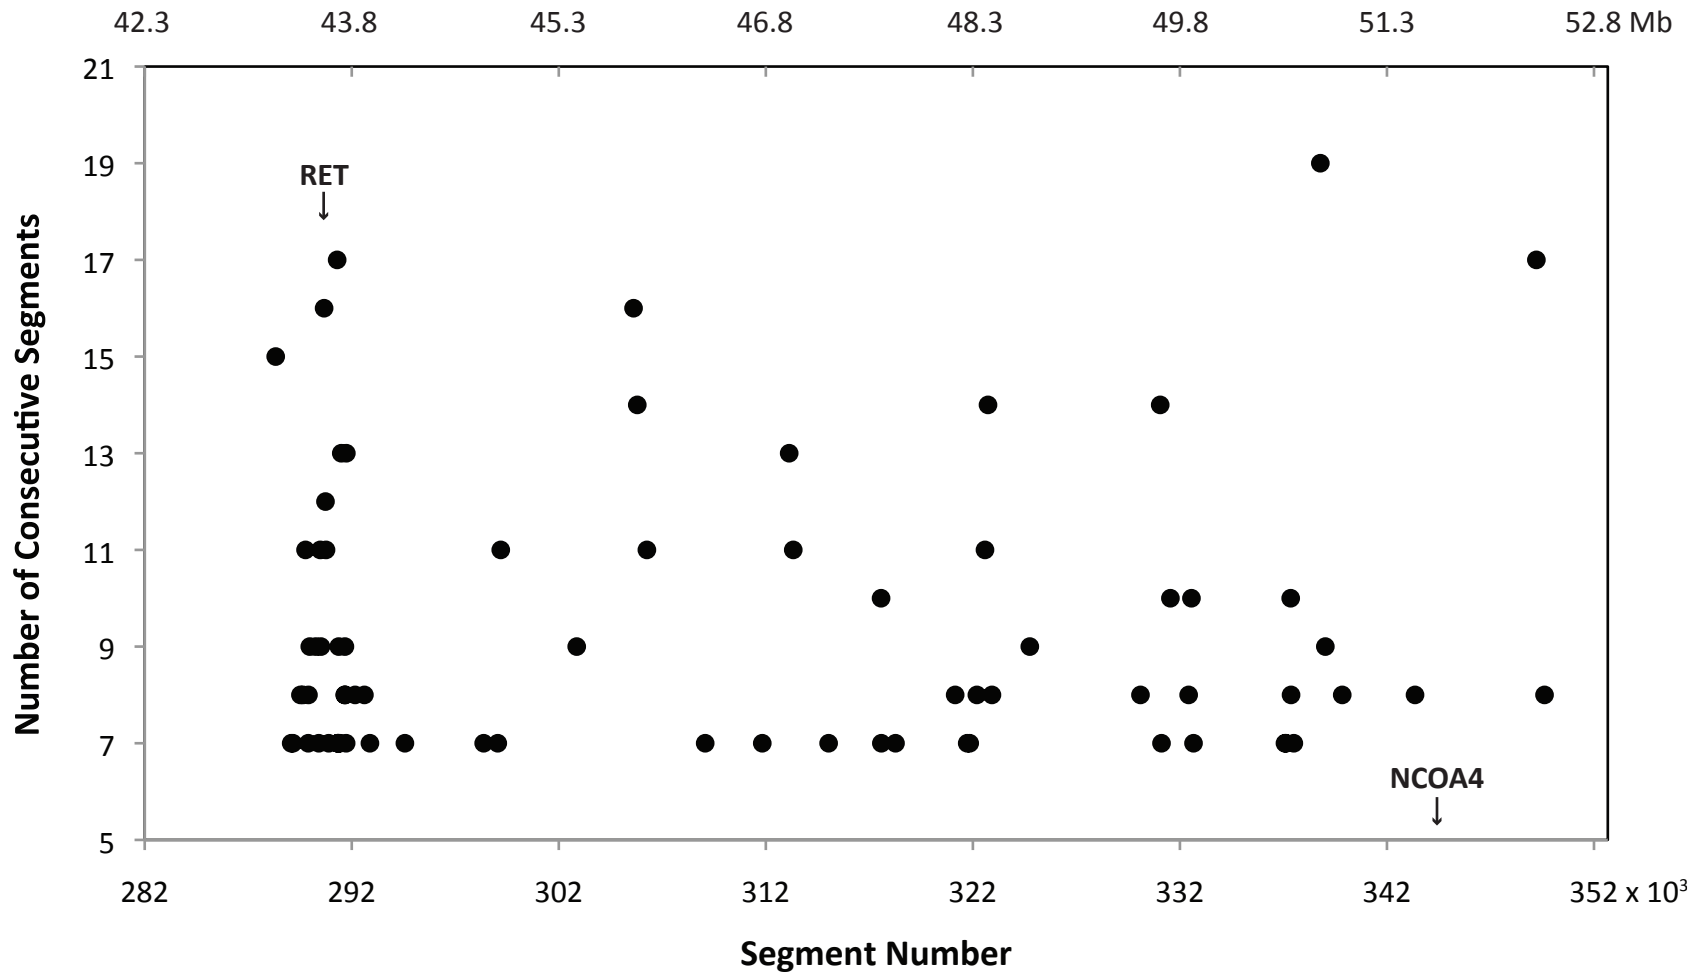

**Figure S5.** Regions predicted to exhibit fragile site breakage within APH-induced common fragile site FRA10G. Regions with at least seven consecutive segments with a predicted free energy values of less than  $-43.61$  kcal/mol are presented. The lower x axis depicts the number of the first 300-nt segment isolated by the threshold, the upper x axis displays the corresponding chromosome 10 nucleotide number, and the y axis depicts the number of consecutive segments within the isolated region. The locations of two translocation participating genes, *RET* (segments 290482-290839) and *NCOA4* (343766-343939), are labeled. *RET* contains five significant regions, while *NCOA4* has none.

A

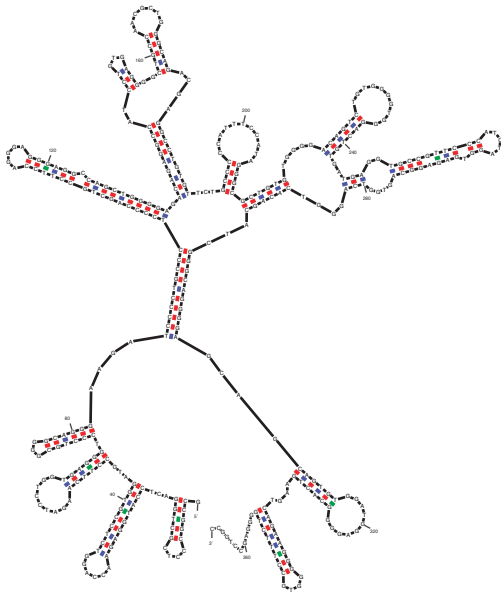

-74.5 kcal/mol

B

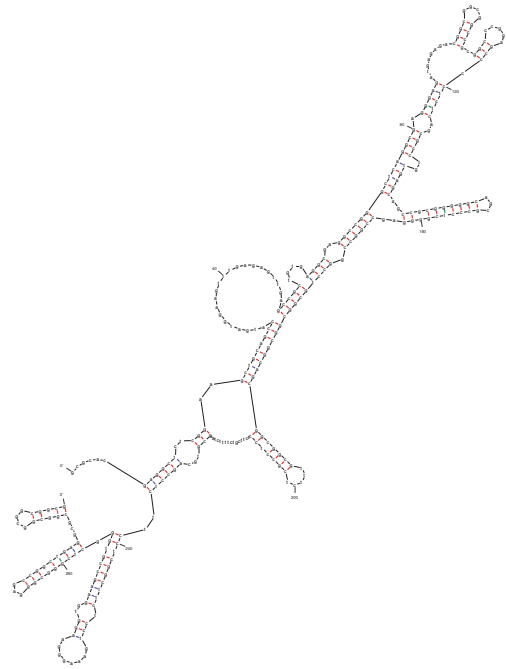

-73.2 kcal/mol

C

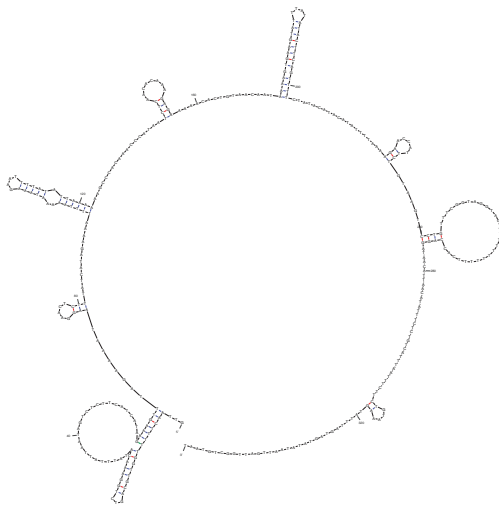

-20.1 kcal/mol

D

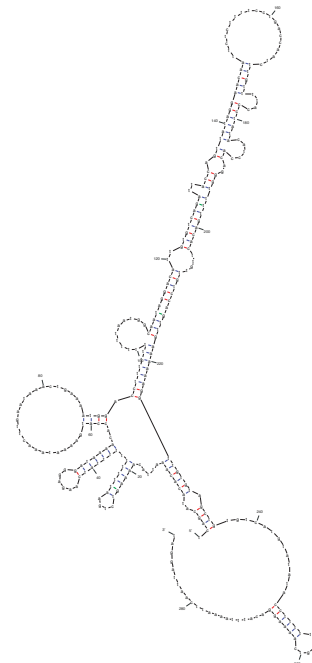

-23.2 kcal/mol

**Figure S6.** The most stable Mfold predicted DNA secondary structures and free energy values for DNA fragments analyzed by *in vitro* reduplexing assays: *RET* intron 11 (A), *PTEN* exon 1 (B), *NCOA4* intron 7 (C), and *PTEN* exon 9 (D).

Table S1. Classification of the Chromosome 10 Sequence Based on Fragile Site Location.

| <b>Region</b> | <b>Cytogenetic location</b> | <b>Fragile Site Class</b> | <b>Mode of Induction</b> | <b>Number of segments</b> | <b>Number of Sections</b> |
|---------------|-----------------------------|---------------------------|--------------------------|---------------------------|---------------------------|
| Non-fragile   | -                           | -                         | -                        | 517301                    | 10334                     |
| FRA10G        | 10q11.2                     | common                    | APH                      | 63867                     | 1272                      |
| FRA10C        | 10q21                       | common                    | BrdU                     | 118000                    | 2360                      |
| FRA10D        | 10q22.1                     | common                    | APH                      | 28668                     | 574                       |
| FRA10A        | 10q23.3, 10q24.2            | rare                      | folic acid               | 67335                     | 1349                      |
| FRA10B        | 10q25.2                     | rare                      | BrdU                     | 20001                     | 401                       |
| FRA10E        | 10q25.2                     | common                    | APH                      | 20001                     | 401                       |
| FRA10F        | 10q26.1                     | common                    | APH                      | 55665                     | 1113                      |

Table S2. Free Energy of Predicted DNA Secondary Structures for Fragile and Non-Fragile Regions of Chromosome 10.

| <b>Region</b>               | <b>Chr 10</b> | <b>Non-fragile</b> | <b>FRA10G</b> | <b>FRA10C</b> | <b>FRA10D</b> | <b>FRA10A</b> | <b>FRA10B/E</b> | <b>FRA10F</b> |
|-----------------------------|---------------|--------------------|---------------|---------------|---------------|---------------|-----------------|---------------|
| Number of segments          | 870837        | 517301             | 63867         | 118000        | 28668         | 67335         | 20001           | 55665         |
| Mean Free Energy (kcal/mol) | -27.2         | -27.5              | -28.1         | -24.0         | -32.0         | -26.3         | -27.2           | -29.4         |
| Standard Deviation          | 9.3           | 9.4                | 10.1          | 7.6           | 10.2          | 8.9           | 8.4             | 9.5           |

Table S3. Percentage of Segments with Free Energy Below -50 kcal/mol.

| Region                                    | Non-fragile       | FRA10G           | FRA10C            | FRA10D           | FRA10A           | FRA10B/E         | FRA10F           |
|-------------------------------------------|-------------------|------------------|-------------------|------------------|------------------|------------------|------------------|
| Segments<br>$\Delta G > -50$<br>kcal/mol* | 506900<br>(98.0%) | 61984<br>(97.1%) | 117153<br>(99.3%) | 27440<br>(95.7%) | 66378<br>(98.6%) | 19765<br>(98.8%) | 54297<br>(97.5%) |
| Segments<br>$\Delta G < -50$<br>kcal/mol* | 10401<br>(2.0%)   | 1883<br>(2.9%)   | 847<br>(0.7%)     | 1228<br>(4.3%)   | 4241<br>(1.4%)   | 236<br>(1.2%)    | 1368<br>(2.5%)   |
| P-value**                                 | -                 | 1.77E-54         | 8.02E-203         | 2.07E-148        | 1.21E-113        | 1.28E-16         | 1.62E-12         |

\*Total number of segments with a free energy value higher or lower than -50 kcal/mol, with the percentage of the total in parentheses

\*\*P-value calculated by comparing each fragile site to non-fragile DNA using a Chi-square test.

\*\*\*Fragile sites highlighted in grey have a significantly greater proportion of segments with a free energy value less than -50 kcal/mol compared to non-fragile DNA.

Table S4. Regions on Chromosome 10 with at Least Seven Consecutive Segments Below -43.61 kcal/mol

| Segment start | Segment end | Number of Consecutive segments | Nucleotide start | Nucleotide end | Chromosomal Position | Fragile site | Gene            | GC content (%) | LINEs (%) | SINEs (%) | LTR elements (%) | DNA transposons (%) | simple repeats (%) |
|---------------|-------------|--------------------------------|------------------|----------------|----------------------|--------------|-----------------|----------------|-----------|-----------|------------------|---------------------|--------------------|
| 1,204         | 1,215       | 12                             | 180,451          | 182,400        | 10p15.3              |              | ZMYND11         | 74             | 0         | 0         | 0                | 0                   | 9                  |
| 2,450         | 2,459       | 10                             | 367,351          | 369,000        | 10p15.3              |              | DIP2C           | 68             | 0         | 0         | 0                | 0                   | 0                  |
| 3,216         | 3,222       | 7                              | 482,251          | 483,450        | 10p15.3              |              | DIP2C           | 60             | 0         | 0         | 0                | 0                   | 0                  |
| 4,166         | 4,172       | 7                              | 624,751          | 625,950        | 10p15.3              |              | DIP2C           | 39             | 0         | 0         | 0                | 0                   | 65                 |
| 4,467         | 4,473       | 7                              | 669,901          | 671,100        | 10p15.3              |              | DIP2C           | 62             | 0         | 0         | 0                | 0                   | 0                  |
| 4,898         | 4,910       | 13                             | 734,551          | 736,650        | 10p15.3              |              | DIP2C           | 71             | 0         | 3         | 0                | 0                   | 13                 |
| 5,210         | 5,219       | 10                             | 781,351          | 783,000        | 10p15.3              |              | none            | 64             | 0         | 0         | 0                | 0                   | 0                  |
| 5,531         | 5,544       | 14                             | 829,501          | 831,750        | 10p15.3              |              | none            | 68             | 0         | 0         | 0                | 0                   | 0                  |
| 8,340         | 8,346       | 7                              | 1,250,851        | 1,252,050      | 10p15.3              |              | ADARB2          | 63             | 0         | 0         | 13               | 0                   | 0                  |
| 9,365         | 9,377       | 13                             | 1,404,601        | 1,406,700      | 10p15.3              |              | ADARB2          | 69             | 0         | 0         | 16               | 0                   | 0                  |
| 10,042        | 10,048      | 7                              | 1,506,151        | 1,507,350      | 10p15.3              |              | ADARB2          | 65             | 46        | 0         | 0                | 0                   | 0                  |
| 11,384        | 11,390      | 7                              | 1,707,451        | 1,708,650      | 10p15.3              |              | ADARB2          | 61             | 19        | 0         | 0                | 0                   | 0                  |
| 11,859        | 11,867      | 9                              | 1,778,701        | 1,780,200      | 10p15.3              |              | ADARB2          | 64             | 0         | 0         | 0                | 0                   | 0                  |
| 20,735        | 20,742      | 8                              | 3,110,101        | 3,111,450      | 10p15.2              |              | PFKP            | 70             | 0         | 0         | 0                | 0                   | 0                  |
| 32,580        | 32,586      | 7                              | 4,886,851        | 4,888,050      | 10p15.1              |              | AKR1E2          | 64             | 0         | 0         | 68               | 0                   | 0                  |
| 39,540        | 39,551      | 12                             | 5,930,851        | 5,932,800      | 10p15.1              |              | ANKRD16, FBXO18 | 74             | 0         | 3         | 0                | 0                   | 0                  |
| 40,127        | 40,134      | 8                              | 6,018,901        | 6,020,250      | 10p15.1              |              | IL15RA          | 73             | 0         | 0         | 0                | 0                   | 0                  |
| 41,244        | 41,254      | 11                             | 6,186,451        | 6,188,250      | 10p15.1              |              | PFKFB3          | 70             | 0         | 0         | 0                | 0                   | 0                  |
| 41,629        | 41,637      | 9                              | 6,244,201        | 6,245,700      | 10p15.1              |              | PFKFB3          | 71             | 0         | 0         | 0                | 0                   | 0                  |
| 41,716        | 41,723      | 8                              | 6,257,251        | 6,258,600      | 10p15.1              |              | PFKFB3          | 61             | 0         | 0         | 0                | 13                  | 12                 |
| 45,845        | 45,861      | 17                             | 6,876,601        | 6,879,300      | 10p14                |              | none            | 22             | 0         | 0         | 0                | 0                   | 84                 |
| 49,696        | 49,702      | 7                              | 7,454,251        | 7,455,450      | 10p14                |              | none            | 65             | 0         | 0         | 0                | 0                   | 4                  |
| 53,943        | 53,960      | 18                             | 8,091,301        | 8,094,150      | 10p14                |              | none            | 67             | 0         | 0         | 0                | 0                   | 0                  |
| 55,406        | 55,413      | 8                              | 8,310,751        | 8,312,100      | 10p14                |              | none            | 9              | 0         | 0         | 0                | 0                   | 93                 |
| 73,730        | 73,738      | 9                              | 11,059,351       | 11,060,850     | 10p14                |              | CUGBP2          | 73             | 0         | 19        | 0                | 0                   | 10                 |
| 77,687        | 77,693      | 7                              | 11,652,901       | 11,654,100     | 10p14                |              | USP6NL          | 71             | 0         | 0         | 0                | 0                   | 8                  |
| 78,561        | 78,567      | 7                              | 11,784,001       | 11,785,200     | 10p14                |              | ECHDC3          | 71             | 0         | 18        | 0                | 0                   | 10                 |
| 79,411        | 79,417      | 7                              | 11,911,501       | 11,912,700     | 10p14                |              | C10orf47        | 71             | 0         | 0         | 0                | 0                   | 0                  |
| 79,573        | 79,580      | 8                              | 11,935,801       | 11,937,150     | 10p14                |              | none            | 65             | 0         | 0         | 0                | 0                   | 0                  |
| 82,604        | 82,617      | 14                             | 12,390,451       | 12,392,700     | 10p13                |              | CAMK1D          | 70             | 0         | 0         | 0                | 0                   | 1                  |
| 83,740        | 83,748      | 9                              | 12,560,851       | 12,562,350     | 10p13                |              | CAMK1D          | 74             | 0         | 0         | 0                | 0                   | 0                  |
| 88,943        | 88,949      | 7                              | 13,341,301       | 13,342,500     | 10p13                |              | PHYH            | 67             | 0         | 19        | 0                | 0                   | 0                  |
| 89,261        | 89,272      | 12                             | 13,389,001       | 13,390,950     | 10p13                |              | SEPHS1          | 70             | 0         | 0         | 0                | 0                   | 1                  |
| 90,468        | 90,475      | 8                              | 13,570,051       | 13,571,400     | 10p13                |              | none            | 79             | 0         | 0         | 0                | 0                   | 19                 |
| 91,324        | 91,331      | 8                              | 13,698,451       | 13,699,800     | 10p13                |              | FRMD4A          | 67             | 0         | 0         | 0                | 0                   | 0                  |
| 97,638        | 97,644      | 7                              | 14,645,551       | 14,646,750     | 10p13                |              | FAM107B         | 75             | 0         | 0         | 0                | 0                   | 4                  |
| 99,198        | 99,206      | 9                              | 14,879,551       | 14,881,050     | 10p13                |              | CDNF,HSPA14     | 66             | 0         | 0         | 0                | 0                   | 0                  |
| 99,469        | 99,475      | 7                              | 14,920,201       | 14,921,400     | 10p13                |              | SUV39H2         | 71             | 0         | 0         | 0                | 0                   | 0                  |
| 101,399       | 101,405     | 7                              | 15,209,701       | 15,210,900     | 10p13                |              | NMT2            | 73             | 0         | 0         | 0                | 0                   | 12                 |
| 102,750       | 102,756     | 7                              | 15,412,351       | 15,413,550     | 10p13                |              | FAM171A1        | 79             | 0         | 0         | 0                | 0                   | 20                 |
| 115,143       | 115,151     | 9                              | 17,271,301       | 17,272,800     | 10p13                |              | VIM             | 65             | 0         | 0         | 0                | 0                   | 0                  |
| 116,636       | 116,644     | 9                              | 17,495,251       | 17,496,750     | 10p12.33             |              | ST8SIA6         | 72             | 0         | 0         | 0                | 0                   | 6                  |
| 117,725       | 117,732     | 8                              | 17,658,601       | 17,659,950     | 10p12.33             |              | PTPLA           | 68             | 0         | 11        | 0                | 0                   | 1                  |
| 117,806       | 117,813     | 8                              | 17,670,751       | 17,672,100     | 10p12.33             |              | none            | 69             | 0         | 0         | 0                | 0                   | 0                  |
| 122,861       | 122,869     | 9                              | 18,429,001       | 18,430,500     | 10p12.33             |              | CACNB2          | 68             | 0         | 0         | 0                | 0                   | 0                  |
| 143,085       | 143,091     | 7                              | 21,462,601       | 21,463,800     | 10p12.31             |              | NEBL            | 72             | 0         | 0         | 0                | 0                   | 0                  |
| 145,231       | 145,238     | 8                              | 21,784,501       | 21,785,850     | 10p12.31             |              | C10orf114       | 69             | 0         | 0         | 0                | 0                   | 0                  |
| 145,323       | 145,330     | 8                              | 21,798,301       | 21,799,650     | 10p12.31             |              | none            | 65             | 0         | 0         | 0                | 0                   | 0                  |



|         |         |    |            |            |          |        |              |    |    |    |   |   |    |
|---------|---------|----|------------|------------|----------|--------|--------------|----|----|----|---|---|----|
| 148,613 | 148,619 | 7  | 22,291,801 | 22,293,000 | 10p12.31 |        | DNAJC1       | 67 | 0  | 0  | 0 | 0 | 3  |
| 150,729 | 150,741 | 13 | 22,609,201 | 22,611,300 | 10p12.2  |        | COMMD3, BM11 | 73 | 0  | 0  | 0 | 0 | 22 |
| 150,827 | 150,839 | 13 | 22,623,901 | 22,626,000 | 10p12.2  |        | none         | 66 | 0  | 0  | 0 | 0 | 0  |
| 151,504 | 151,510 | 7  | 22,725,451 | 22,726,650 | 10p12.2  |        | none         | 67 | 0  | 0  | 0 | 0 | 0  |
| 151,766 | 151,772 | 7  | 22,764,751 | 22,765,950 | 10p12.2  |        | none         | 65 | 0  | 0  | 0 | 0 | 0  |
| 153,349 | 153,359 | 11 | 23,002,201 | 23,004,000 | 10p12.2  |        | PIP4K2A      | 73 | 0  | 0  | 0 | 0 | 10 |
| 156,415 | 156,427 | 13 | 23,462,101 | 23,464,200 | 10p12.2  |        | none         | 66 | 0  | 0  | 0 | 0 | 0  |
| 156,537 | 156,549 | 13 | 23,480,401 | 23,482,500 | 10p12.2  |        | PTF1A        | 71 | 0  | 0  | 0 | 0 | 2  |
| 156,586 | 156,592 | 7  | 23,487,751 | 23,488,950 | 10p12.2  |        | none         | 66 | 0  | 0  | 0 | 0 | 0  |
| 158,185 | 158,196 | 12 | 23,727,601 | 23,729,550 | 10p12.2  |        | OTUD1        | 75 | 0  | 0  | 0 | 0 | 8  |
| 166,297 | 166,310 | 14 | 24,944,401 | 24,946,650 | 10p12.1  |        | ARHGAP21     | 74 | 76 | 0  | 0 | 0 | 0  |
| 166,744 | 166,754 | 11 | 25,011,451 | 25,013,250 | 10p12.1  |        | ARHGAP21     | 72 | 0  | 0  | 0 | 0 | 3  |
| 169,763 | 169,771 | 9  | 25,464,301 | 25,465,800 | 10p12.1  |        | GPR158       | 65 | 0  | 0  | 0 | 0 | 0  |
| 171,182 | 171,189 | 8  | 25,677,151 | 25,678,500 | 10p12.1  |        | GPR158       | 59 | 0  | 0  | 0 | 0 | 0  |
| 183,900 | 183,908 | 9  | 27,584,851 | 27,586,350 | 10p12.1  |        | none         | 69 | 0  | 0  | 0 | 0 | 0  |
| 186,875 | 186,886 | 12 | 28,031,101 | 28,033,050 | 10p12.1  |        | MKX          | 66 | 0  | 0  | 0 | 0 | 0  |
| 192,141 | 192,153 | 13 | 28,821,001 | 28,823,100 | 10p12.1  |        | WAC          | 70 | 0  | 14 | 0 | 0 | 2  |
| 193,106 | 193,115 | 10 | 28,965,751 | 28,967,400 | 10p12.1  |        | BAMBI        | 71 | 0  | 0  | 0 | 0 | 2  |
| 199,901 | 199,908 | 8  | 29,985,001 | 29,986,350 | 10p11.23 |        | SVIL         | 70 | 0  | 0  | 0 | 0 | 0  |
| 200,160 | 200,174 | 15 | 30,023,851 | 30,026,250 | 10p11.23 |        | SVIL         | 71 | 0  | 0  | 0 | 0 | 0  |
| 202,318 | 202,324 | 7  | 30,347,551 | 30,348,750 | 10p11.23 |        | KIAA1462     | 73 | 0  | 0  | 0 | 0 | 11 |
| 204,817 | 204,825 | 9  | 30,722,401 | 30,723,900 | 10p11.23 |        | MAP3K8       | 67 | 0  | 0  | 0 | 0 | 0  |
| 210,722 | 210,729 | 8  | 31,608,151 | 31,609,500 | 10p11.22 |        | ZEB1         | 73 | 0  | 0  | 0 | 0 | 9  |
| 211,004 | 211,011 | 8  | 31,650,451 | 31,651,800 | 10p11.22 |        | ZEB1         | 67 | 0  | 6  | 0 | 0 | 0  |
| 213,655 | 213,661 | 7  | 32,048,101 | 32,049,300 | 10p11.22 |        | none         | 67 | 0  | 0  | 0 | 7 | 0  |
| 214,780 | 214,789 | 10 | 32,216,851 | 32,218,500 | 10p11.22 |        | ARHGAP12     | 69 | 0  | 0  | 0 | 0 | 10 |
| 215,059 | 215,067 | 9  | 32,258,701 | 32,260,200 | 10p11.22 |        | none         | 76 | 0  | 7  | 0 | 0 | 2  |
| 217,568 | 217,578 | 11 | 32,635,051 | 32,636,850 | 10p11.22 |        | EPC1         | 66 | 0  | 0  | 0 | 0 | 0  |
| 221,643 | 221,651 | 9  | 33,246,301 | 33,247,800 | 10p11.22 |        | ITGB1        | 74 | 0  | 0  | 0 | 0 | 3  |
| 224,160 | 224,166 | 7  | 33,623,851 | 33,625,050 | 10p11.22 |        | none         | 70 | 0  | 0  | 0 | 0 | 0  |
| 234,021 | 234,032 | 12 | 35,103,001 | 35,104,950 | 10p11.21 |        | PARD3        | 74 | 0  | 0  | 0 | 0 | 9  |
| 237,500 | 237,510 | 11 | 35,624,851 | 35,626,650 | 10p11.21 |        | CCNY         | 73 | 0  | 10 | 0 | 0 | 5  |
| 239,311 | 239,318 | 8  | 35,896,501 | 35,897,850 | 10p11.21 |        | GJD4         | 66 | 0  | 0  | 0 | 0 | 0  |
| 239,522 | 239,546 | 25 | 35,928,151 | 35,932,050 | 10p11.21 |        | FZD8         | 70 | 0  | 11 | 0 | 0 | 4  |
| 249,424 | 249,431 | 8  | 37,413,451 | 37,414,800 | 10p11.21 |        | ANKRD30A     | 61 | 0  | 45 | 0 | 0 | 0  |
| 253,128 | 253,139 | 12 | 37,969,051 | 37,971,000 | 10p11.21 |        | none         | 65 | 0  | 0  | 0 | 0 | 0  |
| 253,340 | 253,348 | 9  | 38,000,851 | 38,002,350 | 10p11.1  |        | none         | 61 | 0  | 0  | 0 | 0 | 0  |
| 258,253 | 258,261 | 9  | 38,737,801 | 38,739,300 | 10p11.1  |        | none         | 68 | 0  | 0  | 0 | 0 | 0  |
| 288,327 | 288,341 | 15 | 43,248,901 | 43,251,300 | 10q11.21 | FRA10G | none         | 68 | 0  | 0  | 0 | 0 | 0  |
| 289,075 | 289,081 | 7  | 43,361,101 | 43,362,300 | 10q11.21 | FRA10G | none         | 64 | 30 | 10 | 0 | 0 | 0  |
| 289,158 | 289,164 | 7  | 43,373,551 | 43,374,750 | 10q11.21 | FRA10G | none         | 62 | 0  | 0  | 0 | 0 | 0  |
| 289,521 | 289,528 | 8  | 43,428,001 | 43,429,350 | 10q11.21 | FRA10G | none         | 66 | 0  | 0  | 0 | 0 | 0  |
| 289,643 | 289,650 | 8  | 43,446,301 | 43,447,650 | 10q11.21 | FRA10G | none         | 63 | 58 | 0  | 0 | 0 | 0  |
| 289,768 | 289,778 | 11 | 43,465,051 | 43,466,850 | 10q11.21 | FRA10G | none         | 59 | 0  | 0  | 0 | 0 | 0  |
| 289,900 | 289,906 | 7  | 43,484,851 | 43,486,050 | 10q11.21 | FRA10G | none         | 61 | 0  | 0  | 0 | 0 | 10 |
| 289,909 | 289,916 | 8  | 43,486,201 | 43,487,550 | 10q11.21 | FRA10G | none         | 63 | 5  | 0  | 0 | 0 | 0  |
| 289,973 | 289,981 | 9  | 43,495,801 | 43,497,300 | 10q11.21 | FRA10G | none         | 61 | 0  | 0  | 0 | 0 | 0  |
| 290,263 | 290,271 | 9  | 43,539,301 | 43,540,800 | 10q11.21 | FRA10G | none         | 62 | 0  | 0  | 0 | 0 | 0  |
| 290,408 | 290,414 | 7  | 43,561,051 | 43,562,250 | 10q11.21 | FRA10G | none         | 57 | 0  | 0  | 0 | 0 | 0  |
| 290,479 | 290,489 | 11 | 43,571,701 | 43,573,500 | 10q11.21 | FRA10G | RET          | 71 | 0  | 4  | 0 | 0 | 13 |
| 290,511 | 290,519 | 9  | 43,576,501 | 43,578,000 | 10q11.21 | FRA10G | RET          | 62 | 0  | 0  | 0 | 0 | 3  |
| 290,665 | 290,680 | 16 | 43,599,601 | 43,602,150 | 10q11.21 | FRA10G | RET          | 63 | 0  | 19 | 0 | 0 | 0  |

|         |         |    |            |            |          |        |            |    |    |    |    |    |    |
|---------|---------|----|------------|------------|----------|--------|------------|----|----|----|----|----|----|
| 290,731 | 290,742 | 12 | 43,609,501 | 43,611,450 | 10q11.21 | FRA10G | RET        | 61 | 0  | 4  | 0  | 0  | 0  |
| 290,757 | 290,767 | 11 | 43,613,401 | 43,615,200 | 10q11.21 | FRA10G | RET        | 62 | 0  | 0  | 0  | 0  | 0  |
| 290,887 | 290,893 | 7  | 43,632,901 | 43,634,100 | 10q11.21 | FRA10G | CSGALNACT2 | 67 | 0  | 31 | 0  | 0  | 0  |
| 291,295 | 291,311 | 17 | 43,694,101 | 43,696,800 | 10q11.21 | FRA10G | RASGEF1A   | 61 | 0  | 0  | 0  | 0  | 0  |
| 291,325 | 291,331 | 7  | 43,698,601 | 43,699,800 | 10q11.21 | FRA10G | RASGEF1A   | 67 | 0  | 0  | 0  | 0  | 36 |
| 291,335 | 291,341 | 7  | 43,700,101 | 43,701,300 | 10q11.21 | FRA10G | RASGEF1A   | 63 | 0  | 0  | 0  | 0  | 0  |
| 291,344 | 291,350 | 7  | 43,701,451 | 43,702,650 | 10q11.21 | FRA10G | RASGEF1A   | 64 | 6  | 0  | 0  | 0  | 0  |
| 291,371 | 291,379 | 9  | 43,705,501 | 43,707,000 | 10q11.21 | FRA10G | RASGEF1A   | 60 | 0  | 19 | 0  | 17 | 0  |
| 291,421 | 291,427 | 7  | 43,713,001 | 43,714,200 | 10q11.21 | FRA10G | RASGEF1A   | 62 | 7  | 0  | 0  | 0  | 0  |
| 291,494 | 291,506 | 13 | 43,723,951 | 43,726,050 | 10q11.21 | FRA10G | RASGEF1A   | 69 | 12 | 0  | 0  | 0  | 6  |
| 291,659 | 291,666 | 8  | 43,748,701 | 43,750,050 | 10q11.21 | FRA10G | RASGEF1A   | 62 | 0  | 0  | 39 | 0  | 0  |
| 291,669 | 291,677 | 9  | 43,750,201 | 43,751,700 | 10q11.21 | FRA10G | RASGEF1A   | 63 | 0  | 10 | 0  | 0  | 0  |
| 291,683 | 291,690 | 8  | 43,752,301 | 43,753,650 | 10q11.21 | FRA10G | RASGEF1A   | 60 | 0  | 6  | 0  | 0  | 0  |
| 291,729 | 291,735 | 7  | 43,759,201 | 43,760,400 | 10q11.21 | FRA10G | RASGEF1A   | 63 | 0  | 0  | 0  | 0  | 0  |
| 291,739 | 291,751 | 13 | 43,760,701 | 43,762,800 | 10q11.21 | FRA10G | RASGEF1A   | 70 | 0  | 5  | 0  | 0  | 6  |
| 292,162 | 292,169 | 8  | 43,824,151 | 43,825,500 | 10q11.21 | FRA10G | none       | 65 | 34 | 22 | 0  | 0  | 2  |
| 292,611 | 292,618 | 8  | 43,891,501 | 43,892,850 | 10q11.21 | FRA10G | HNRNPF     | 69 | 0  | 0  | 0  | 7  | 3  |
| 292,878 | 292,884 | 7  | 43,931,551 | 43,932,750 | 10q11.21 | FRA10G | none       | 64 | 0  | 19 | 0  | 0  | 0  |
| 294,567 | 294,573 | 7  | 44,184,901 | 44,186,100 | 10q11.21 | FRA10G | none       | 65 | 11 | 0  | 0  | 0  | 0  |
| 298,372 | 298,378 | 7  | 44,755,651 | 44,756,850 | 10q11.21 | FRA10G | none       | 57 | 0  | 0  | 0  | 0  | 0  |
| 299,053 | 299,059 | 7  | 44,857,801 | 44,859,000 | 10q11.21 | FRA10G | none       | 55 | 0  | 0  | 0  | 0  | 2  |
| 299,197 | 299,207 | 11 | 44,879,401 | 44,881,200 | 10q11.21 | FRA10G | CXCL12     | 68 | 0  | 0  | 0  | 0  | 4  |
| 302,866 | 302,874 | 9  | 45,429,751 | 45,431,250 | 10q11.21 | FRA10G | TMEM72     | 59 | 0  | 0  | 0  | 0  | 0  |
| 305,611 | 305,626 | 16 | 45,841,501 | 45,844,050 | 10q11.21 | FRA10G | none       | 66 | 0  | 0  | 0  | 0  | 3  |
| 305,791 | 305,804 | 14 | 45,868,501 | 45,870,750 | 10q11.21 | FRA10G | ALOX5      | 65 | 43 | 5  | 0  | 0  | 2  |
| 306,255 | 306,265 | 11 | 45,938,101 | 45,939,900 | 10q11.21 | FRA10G | ALOX5      | 69 | 0  | 0  | 0  | 0  | 0  |
| 309,071 | 309,077 | 7  | 46,360,501 | 46,361,700 | 10q11.22 | FRA10G | none       | 65 | 0  | 0  | 0  | 0  | 0  |
| 311,828 | 311,834 | 7  | 46,774,051 | 46,775,250 | 10q11.22 | FRA10G | none       | 70 | 0  | 0  | 0  | 0  | 0  |
| 313,128 | 313,140 | 13 | 46,969,051 | 46,971,150 | 10q11.22 | FRA10G | SYT15      | 67 | 0  | 8  | 0  | 0  | 0  |
| 313,325 | 313,335 | 11 | 46,998,601 | 47,000,400 | 10q11.22 | FRA10G | GPRIN2     | 64 | 0  | 7  | 0  | 4  | 0  |
| 315,033 | 315,039 | 7  | 47,254,801 | 47,256,000 | 10q11.22 | FRA10G | none       | 70 | 0  | 0  | 0  | 0  | 0  |
| 317,566 | 317,575 | 10 | 47,634,751 | 47,636,400 | 10q11.22 | FRA10G | none       | 57 | 0  | 0  | 0  | 9  | 0  |
| 317,580 | 317,586 | 7  | 47,636,851 | 47,638,050 | 10q11.22 | FRA10G | none       | 62 | 8  | 0  | 0  | 0  | 0  |
| 318,263 | 318,269 | 7  | 47,739,301 | 47,740,500 | 10q11.22 | FRA10G | none       | 60 | 0  | 10 | 0  | 0  | 0  |
| 321,145 | 321,152 | 8  | 48,171,601 | 48,172,950 | 10q11.22 | FRA10G | none       | 61 | 0  | 0  | 0  | 0  | 0  |
| 321,727 | 321,733 | 7  | 48,258,901 | 48,260,100 | 10q11.22 | FRA10G | ANXA8      | 58 | 0  | 7  | 0  | 0  | 0  |
| 321,847 | 321,853 | 7  | 48,276,901 | 48,278,100 | 10q11.22 | FRA10G | none       | 61 | 0  | 0  | 0  | 0  | 0  |
| 322,193 | 322,200 | 8  | 48,328,801 | 48,330,150 | 10q11.22 | FRA10G | none       | 58 | 31 | 0  | 0  | 0  | 0  |
| 322,585 | 322,595 | 11 | 48,387,601 | 48,389,400 | 10q11.22 | FRA10G | RBP3       | 63 | 0  | 0  | 0  | 3  | 0  |
| 322,731 | 322,744 | 14 | 48,409,501 | 48,411,750 | 10q11.22 | FRA10G | none       | 57 | 0  | 0  | 0  | 0  | 0  |
| 322,921 | 322,928 | 8  | 48,438,001 | 48,439,350 | 10q11.22 | FRA10G | GDF10      | 70 | 0  | 0  | 0  | 27 | 3  |
| 324,750 | 324,758 | 9  | 48,712,351 | 48,713,850 | 10q11.22 | FRA10G | none       | 61 | 0  | 10 | 0  | 8  | 0  |
| 330,095 | 330,102 | 8  | 49,514,101 | 49,515,450 | 10q11.22 | FRA10G | none       | 70 | 0  | 0  | 0  | 0  | 0  |
| 331,049 | 331,062 | 14 | 49,657,201 | 49,659,450 | 10q11.22 | FRA10G | ARHFAP22   | 65 | 0  | 0  | 0  | 0  | 0  |
| 331,111 | 331,117 | 7  | 49,666,501 | 49,667,700 | 10q11.22 | FRA10G | ARHFAP22   | 61 | 0  | 0  | 0  | 3  | 0  |
| 331,541 | 331,550 | 10 | 49,731,001 | 49,732,650 | 10q11.22 | FRA10G | ARHFAP22   | 68 | 17 | 0  | 0  | 7  | 0  |
| 332,422 | 332,429 | 8  | 49,863,151 | 49,864,500 | 10q11.22 | FRA10G | none       | 69 | 0  | 0  | 0  | 0  | 5  |
| 332,557 | 332,566 | 10 | 49,883,401 | 49,885,050 | 10q11.22 | FRA10G | none       | 20 | 0  | 0  | 0  | 0  | 98 |
| 332,657 | 332,663 | 7  | 49,898,401 | 49,899,600 | 10q11.22 | FRA10G | WDFY4      | 59 | 0  | 0  | 71 | 0  | 0  |
| 337,074 | 337,080 | 7  | 50,560,951 | 50,562,150 | 10q11.23 | FRA10G | none       | 55 | 0  | 0  | 4  | 0  | 0  |
| 337,122 | 337,128 | 7  | 50,568,151 | 50,569,350 | 10q11.23 | FRA10G | none       | 59 | 0  | 14 | 0  | 0  | 0  |
| 337,351 | 337,360 | 10 | 50,602,501 | 50,604,150 | 10q11.23 | FRA10G | none       | 67 | 0  | 0  | 0  | 0  | 0  |

|         |         |    |            |            |          |        |               |    |    |    |    |    |    |
|---------|---------|----|------------|------------|----------|--------|---------------|----|----|----|----|----|----|
| 337,368 | 337,375 | 8  | 50,605,051 | 50,606,400 | 10q11.23 | FRA10G | none          | 64 | 0  | 0  | 0  | 0  | 0  |
| 337,502 | 337,508 | 7  | 50,625,151 | 50,626,350 | 10q11.23 | FRA10G | none          | 64 | 0  | 0  | 0  | 0  | 0  |
| 338,783 | 338,801 | 19 | 50,817,301 | 50,820,300 | 10q11.23 | FRA10G | CHAT, SLC18A3 | 69 | 0  | 0  | 0  | 0  | 0  |
| 339,024 | 339,032 | 9  | 50,853,451 | 50,854,950 | 10q11.23 | FRA10G | CHAT          | 58 | 0  | 0  | 33 | 0  | 0  |
| 339,840 | 339,847 | 8  | 50,975,851 | 50,977,200 | 10q11.23 | FRA10G | none          | 67 | 0  | 0  | 0  | 0  | 0  |
| 343,356 | 343,363 | 8  | 51,503,251 | 51,504,600 | 10q11.23 | FRA10G | none          | 61 | 22 | 0  | 0  | 0  | 0  |
| 349,217 | 349,233 | 17 | 52,382,401 | 52,385,100 | 10q11.23 | FRA10G | SGMS1         | 68 | 0  | 0  | 0  | 0  | 0  |
| 349,611 | 349,618 | 8  | 52,441,501 | 52,442,850 | 10q11.23 | FRA10G | none          | 62 | 0  | 0  | 0  | 0  | 0  |
| 358,823 | 358,830 | 8  | 53,823,301 | 53,824,650 | 10q21.1  | FRA10C | PRKG1         | 59 | 0  | 0  | 99 | 0  | 0  |
| 360,708 | 360,716 | 9  | 54,106,051 | 54,107,550 | 10q21.1  | FRA10C | none          | 63 | 0  | 19 | 0  | 0  | 0  |
| 396,351 | 396,358 | 8  | 59,452,501 | 59,453,850 | 10q21.1  | FRA10C | none          | 26 | 0  | 0  | 0  | 0  | 78 |
| 400,179 | 400,185 | 7  | 60,026,701 | 60,027,900 | 10q21.1  | FRA10C | IPMK          | 67 | 0  | 0  | 0  | 0  | 23 |
| 400,630 | 400,636 | 7  | 60,094,351 | 60,095,550 | 10q21.1  | FRA10C | UBE2D1        | 63 | 0  | 3  | 0  | 0  | 0  |
| 406,239 | 406,246 | 8  | 60,935,701 | 60,937,050 | 10q21.1  | FRA10C | PHYHIPL       | 67 | 0  | 0  | 0  | 0  | 0  |
| 411,103 | 411,110 | 8  | 61,665,301 | 61,666,650 | 10q21.2  | FRA10C | CCDC6         | 69 | 0  | 0  | 0  | 0  | 3  |
| 418,021 | 418,031 | 11 | 62,703,001 | 62,704,800 | 10q21.2  | FRA10C | RHOBTB1       | 65 | 0  | 0  | 0  | 0  | 0  |
| 430,428 | 430,437 | 10 | 64,564,051 | 64,565,700 | 10q21.3  | FRA10C | ADO           | 67 | 0  | 0  | 0  | 0  | 0  |
| 431,382 | 431,388 | 7  | 64,707,151 | 64,708,350 | 10q21.3  | FRA10C | none          | 76 | 0  | 0  | 0  | 0  | 0  |
| 434,832 | 434,839 | 8  | 65,224,651 | 65,226,000 | 10q21.3  | FRA10C | JMJD1C        | 67 | 0  | 0  | 0  | 0  | 2  |
| 435,205 | 435,211 | 7  | 65,280,601 | 65,281,800 | 10q21.3  | FRA10C | REEP3         | 72 | 0  | 0  | 0  | 0  | 3  |
| 463,239 | 463,245 | 7  | 69,485,701 | 69,486,900 | 10q21.3  | FRA10C | none          | 8  | 0  | 0  | 0  | 0  | 71 |
| 468,701 | 468,707 | 7  | 70,305,001 | 70,306,200 | 10q21.3  | FRA10C | none          | 49 | 0  | 79 | 0  | 0  | 32 |
| 470,579 | 470,587 | 9  | 70,586,701 | 70,588,200 | 10q21.3  | FRA10C | STOX1         | 74 | 0  | 16 | 0  | 0  | 0  |
| 472,556 | 472,562 | 7  | 70,883,251 | 70,884,450 | 10q22.1  | FRA10D | VPS26A        | 68 | 0  | 0  | 0  | 0  | 0  |
| 473,851 | 473,861 | 11 | 71,077,501 | 71,079,300 | 10q22.1  | FRA10D | HK1           | 68 | 0  | 8  | 0  | 0  | 2  |
| 475,545 | 475,555 | 11 | 71,331,601 | 71,333,400 | 10q22.1  | FRA10D | NEUROG3       | 65 | 0  | 0  | 0  | 0  | 0  |
| 475,964 | 475,973 | 10 | 71,394,451 | 71,396,100 | 10q22.1  | FRA10D | none          | 60 | 0  | 8  | 0  | 0  | 0  |
| 476,024 | 476,031 | 8  | 71,403,451 | 71,404,800 | 10q22.1  | FRA10D | none          | 57 | 0  | 14 | 0  | 0  | 0  |
| 476,078 | 476,085 | 8  | 71,411,551 | 71,412,900 | 10q22.1  | FRA10D | none          | 61 | 0  | 0  | 32 | 0  | 0  |
| 477,601 | 477,607 | 7  | 71,640,001 | 71,641,200 | 10q22.1  | FRA10D | COL13A1       | 61 | 0  | 11 | 0  | 0  | 0  |
| 478,348 | 478,355 | 8  | 71,752,051 | 71,753,400 | 10q22.1  | FRA10D | none          | 67 | 0  | 0  | 0  | 0  | 0  |
| 478,748 | 478,759 | 12 | 71,812,051 | 71,814,000 | 10q22.1  | FRA10D | H2AFY2        | 65 | 0  | 0  | 0  | 0  | 3  |
| 479,365 | 479,375 | 11 | 71,904,601 | 71,906,400 | 10q22.1  | FRA10D | TYSND1        | 67 | 0  | 0  | 0  | 0  | 4  |
| 479,989 | 480,002 | 14 | 71,998,201 | 72,000,450 | 10q22.1  | FRA10D | none          | 67 | 0  | 0  | 0  | 0  | 0  |
| 480,097 | 480,103 | 7  | 72,014,401 | 72,015,600 | 10q22.1  | FRA10D | NPFFR1        | 67 | 0  | 15 | 0  | 0  | 0  |
| 480,556 | 480,562 | 7  | 72,083,251 | 72,084,450 | 10q22.1  | FRA10D | LRRC20        | 63 | 0  | 0  | 0  | 0  | 0  |
| 480,941 | 480,949 | 9  | 72,141,001 | 72,142,500 | 10q22.1  | FRA10D | LRRC20        | 64 | 0  | 7  | 20 | 0  | 0  |
| 481,583 | 481,593 | 11 | 72,237,301 | 72,239,100 | 10q22.1  | FRA10D | KIAA1274      | 68 | 0  | 4  | 0  | 0  | 0  |
| 481,979 | 481,986 | 8  | 72,296,701 | 72,298,050 | 10q22.1  | FRA10D | KIAA1274      | 57 | 0  | 34 | 0  | 0  | 0  |
| 482,878 | 482,884 | 7  | 72,431,551 | 72,432,750 | 10q22.1  | FRA10D | ADAMTS14      | 69 | 0  | 8  | 0  | 0  | 9  |
| 482,976 | 482,989 | 14 | 72,446,251 | 72,448,500 | 10q22.1  | FRA10D | ADAMTS14      | 72 | 0  | 0  | 0  | 0  | 0  |
| 483,410 | 483,417 | 8  | 72,511,351 | 72,512,700 | 10q22.1  | FRA10D | ADAMTS14      | 62 | 0  | 0  | 0  | 0  | 0  |
| 483,472 | 483,479 | 8  | 72,520,651 | 72,522,000 | 10q22.1  | FRA10D | ADAMTS14      | 60 | 0  | 0  | 0  | 0  | 0  |
| 484,316 | 484,322 | 7  | 72,647,251 | 72,648,450 | 10q22.1  | FRA10D | PCBD1         | 68 | 0  | 0  | 0  | 0  | 2  |
| 484,626 | 484,633 | 8  | 72,693,751 | 72,695,100 | 10q22.1  | FRA10D | none          | 59 | 27 | 8  | 0  | 8  | 0  |
| 485,096 | 485,103 | 8  | 72,764,251 | 72,765,600 | 10q22.1  | FRA10D | none          | 59 | 0  | 16 | 0  | 0  | 0  |
| 486,480 | 486,487 | 8  | 72,971,851 | 72,973,200 | 10q22.1  | FRA10D | UNC5B         | 68 | 0  | 0  | 0  | 0  | 2  |
| 486,770 | 486,776 | 7  | 73,015,351 | 73,016,550 | 10q22.1  | FRA10D | UNC5B         | 55 | 0  | 15 | 0  | 0  | 0  |
| 486,962 | 486,968 | 7  | 73,044,151 | 73,045,350 | 10q22.1  | FRA10D | UNC5B         | 61 | 62 | 9  | 0  | 0  | 0  |
| 487,706 | 487,718 | 13 | 73,155,751 | 73,157,850 | 10q22.1  | FRA10D | CDH23         | 70 | 12 | 0  | 0  | 0  | 8  |
| 488,051 | 488,057 | 7  | 73,207,501 | 73,208,700 | 10q22.1  | FRA10D | CDH23         | 57 | 0  | 7  | 0  | 0  | 0  |
| 488,936 | 488,942 | 7  | 73,340,251 | 73,341,450 | 10q22.1  | FRA10D | CDH23         | 54 | 0  | 0  | 0  | 14 | 0  |

|         |         |    |            |            |         |        |                  |    |     |    |    |    |    |
|---------|---------|----|------------|------------|---------|--------|------------------|----|-----|----|----|----|----|
| 489,815 | 489,821 | 7  | 73,472,101 | 73,473,300 | 10q22.1 | FRA10D | CDH23, C10orf105 | 60 | 0   | 11 | 38 | 0  | 0  |
| 490,216 | 490,222 | 7  | 73,532,251 | 73,533,450 | 10q22.1 | FRA10D | CDH23, C10orf54  | 65 | 0   | 6  | 0  | 0  | 0  |
| 490,324 | 490,336 | 13 | 73,548,451 | 73,550,550 | 10q22.1 | FRA10D | CDH23            | 60 | 3   | 15 | 0  | 0  | 0  |
| 490,475 | 490,482 | 8  | 73,571,101 | 73,572,450 | 10q22.1 | FRA10D | CDH23            | 64 | 0   | 0  | 0  | 0  | 0  |
| 490,859 | 490,866 | 8  | 73,628,701 | 73,630,050 | 10q22.1 | FRA10D | none             | 68 | 0   | 0  | 0  | 0  | 0  |
| 491,488 | 491,497 | 10 | 73,723,051 | 73,724,700 | 10q22.1 | FRA10D | CHST3            | 68 | 0   | 0  | 0  | 0  | 2  |
| 491,780 | 491,788 | 9  | 73,766,851 | 73,768,350 | 10q22.1 | FRA10D | CHST3            | 67 | 0   | 0  | 0  | 0  | 0  |
| 492,267 | 492,274 | 8  | 73,839,901 | 73,841,250 | 10q22.1 | FRA10D | SPOCK2           | 59 | 0   | 3  | 0  | 17 | 0  |
| 492,311 | 492,321 | 11 | 73,846,501 | 73,848,300 | 10q22.1 | FRA10D | SPOCK2           | 68 | 0   | 0  | 0  | 0  | 0  |
| 493,551 | 493,557 | 7  | 74,032,501 | 74,033,700 | 10q22.1 | FRA10D | DDIT4            | 63 | 0   | 0  | 0  | 0  | 0  |
| 493,897 | 493,906 | 10 | 74,084,401 | 74,086,050 | 10q22.1 | FRA10D | none             | 64 | 0   | 20 | 0  | 0  | 0  |
| 493,919 | 493,927 | 9  | 74,087,701 | 74,089,200 | 10q22.1 | FRA10D | none             | 61 | 0   | 0  | 94 | 0  | 0  |
| 493,963 | 493,969 | 7  | 74,094,301 | 74,095,500 | 10q22.1 | FRA10D | DNAJB12          | 62 | 0   | 0  | 0  | 0  | 0  |
| 499,038 | 499,045 | 8  | 74,855,551 | 74,856,900 | 10q22.1 | FRA10D | P4HA1            | 61 | 0   | 0  | 0  | 0  | 0  |
| 503,282 | 503,288 | 7  | 75,492,151 | 75,493,350 | 10q22.2 |        | none             | 71 | 0   | 0  | 0  | 0  | 0  |
| 503,545 | 503,552 | 8  | 75,531,601 | 75,532,950 | 10q22.2 |        | SEC24C, FUT11    | 65 | 0   | 0  | 0  | 0  | 0  |
| 503,804 | 503,811 | 8  | 75,570,451 | 75,571,800 | 10q22.2 |        | NDST2            | 72 | 0   | 17 | 0  | 0  | 0  |
| 503,992 | 503,998 | 7  | 75,598,651 | 75,599,850 | 10q22.2 |        | CAMK2G           | 65 | 0   | 10 | 0  | 14 | 0  |
| 504,222 | 504,231 | 10 | 75,633,151 | 75,634,800 | 10q22.2 |        | CAMK2G           | 74 | 0   | 0  | 0  | 0  | 4  |
| 510,563 | 510,572 | 10 | 76,584,301 | 76,585,950 | 10q22.2 |        | none             | 71 | 0   | 0  | 0  | 0  | 9  |
| 513,131 | 513,139 | 9  | 76,969,501 | 76,971,000 | 10q22.2 |        | VDAC2            | 66 | 0   | 0  | 12 | 0  | 0  |
| 513,292 | 513,305 | 14 | 76,993,651 | 76,995,900 | 10q22.2 |        | COMTD1           | 70 | 0   | 0  | 0  | 0  | 0  |
| 513,951 | 513,959 | 9  | 77,092,501 | 77,094,000 | 10q22.2 |        | none             | 71 | 0   | 0  | 0  | 0  | 0  |
| 514,367 | 514,379 | 13 | 77,154,901 | 77,157,000 | 10q22.2 |        | none             | 68 | 0   | 0  | 0  | 0  | 1  |
| 514,390 | 514,399 | 10 | 77,158,351 | 77,160,000 | 10q22.2 |        | ZNF503           | 70 | 0   | 0  | 0  | 0  | 2  |
| 514,447 | 514,453 | 7  | 77,166,901 | 77,168,100 | 10q22.2 |        | none             | 62 | 0   | 0  | 0  | 0  | 0  |
| 529,315 | 529,323 | 9  | 79,397,101 | 79,398,600 | 10q22.3 |        | KCNMA1           | 74 | 0   | 0  | 0  | 0  | 9  |
| 531,237 | 531,246 | 10 | 79,685,401 | 79,687,050 | 10q22.3 |        | DLG5             | 74 | 0   | 0  | 0  | 0  | 3  |
| 533,969 | 533,975 | 7  | 80,095,201 | 80,096,400 | 10q22.3 |        | none             | 57 | 0   | 10 | 0  | 0  | 0  |
| 534,854 | 534,860 | 7  | 80,227,951 | 80,229,150 | 10q22.3 |        | none             | 67 | 0   | 0  | 26 | 0  | 0  |
| 537,820 | 537,826 | 7  | 80,672,851 | 80,674,050 | 10q22.3 |        | none             | 61 | 0   | 0  | 0  | 15 | 0  |
| 538,220 | 538,226 | 7  | 80,732,851 | 80,734,050 | 10q22.3 |        | none             | 66 | 0   | 0  | 0  | 0  | 3  |
| 538,856 | 538,874 | 19 | 80,828,251 | 80,831,250 | 10q22.3 |        | ZMIZ1            | 68 | 0   | 0  | 0  | 0  | 1  |
| 539,313 | 539,320 | 8  | 80,896,801 | 80,898,150 | 10q22.3 |        | ZMIZ1            | 61 | 0   | 0  | 0  | 24 | 0  |
| 539,463 | 539,472 | 10 | 80,919,301 | 80,920,950 | 10q22.3 |        | ZMIZ1            | 58 | 0   | 50 | 0  | 0  | 0  |
| 539,594 | 539,600 | 7  | 80,938,951 | 80,940,150 | 10q22.3 |        | ZMIZ1            | 60 | 59  | 9  | 0  | 0  | 0  |
| 540,016 | 540,024 | 9  | 81,002,251 | 81,003,750 | 10q22.3 |        | ZMIZ1            | 74 | 0   | 0  | 0  | 0  | 2  |
| 540,229 | 540,235 | 7  | 81,034,201 | 81,035,400 | 10q22.3 |        | ZMIZ1            | 61 | 0   | 0  | 0  | 7  | 0  |
| 540,713 | 540,719 | 7  | 81,106,801 | 81,108,000 | 10q22.3 |        | PPIF             | 66 | 0   | 13 | 0  | 7  | 0  |
| 541,001 | 541,007 | 7  | 81,150,001 | 81,151,200 | 10q22.3 |        | ZCCHC24          | 59 | 0   | 25 | 0  | 0  | 0  |
| 541,140 | 541,148 | 9  | 81,170,851 | 81,172,350 | 10q22.3 |        | ZCCHC24          | 59 | 0   | 7  | 0  | 0  | 0  |
| 541,363 | 541,370 | 8  | 81,204,301 | 81,205,650 | 10q22.3 |        | ZCCHC24          | 72 | 0   | 0  | 0  | 0  | 7  |
| 541,775 | 541,782 | 8  | 81,266,101 | 81,267,450 | 10q22.3 |        | none             | 59 | 0   | 0  | 0  | 0  | 0  |
| 542,955 | 542,961 | 7  | 81,443,101 | 81,444,300 | 10q22.3 |        | none             | 60 | 0   | 0  | 0  | 0  | 0  |
| 543,123 | 543,130 | 8  | 81,468,301 | 81,469,650 | 10q22.3 |        | none             | 63 | 0   | 0  | 0  | 0  | 0  |
| 543,903 | 543,912 | 10 | 81,585,301 | 81,586,950 | 10q22.3 |        | none             | 71 | 0   | 0  | 0  | 0  | 2  |
| 544,043 | 544,051 | 9  | 81,606,301 | 81,607,800 | 10q22.3 |        | FAM22E           | 62 | 0   | 0  | 24 | 0  | 0  |
| 544,942 | 544,948 | 7  | 81,741,151 | 81,742,350 | 10q22.3 |        | none             | 70 | 6   | 0  | 0  | 0  | 0  |
| 548,090 | 548,097 | 8  | 82,213,351 | 82,214,700 | 10q23.1 |        | TSPAN14          | 73 | 0   | 0  | 0  | 0  | 11 |
| 548,625 | 548,631 | 7  | 82,293,601 | 82,294,800 | 10q23.1 |        | none             | 76 | 0   | 0  | 0  | 0  | 0  |
| 552,280 | 552,288 | 9  | 82,841,851 | 82,843,350 | 10q23.1 |        | none             | 57 | 100 | 0  | 0  | 0  | 0  |
| 555,532 | 555,541 | 10 | 83,329,651 | 83,331,300 | 10q23.1 |        | none             | 61 | 0   | 0  | 82 | 0  | 0  |

|         |         |    |            |            |          |        |                   |    |    |    |    |   |   |
|---------|---------|----|------------|------------|----------|--------|-------------------|----|----|----|----|---|---|
| 557,560 | 557,570 | 11 | 83,633,851 | 83,635,650 | 10q23.1  |        | NRG3              | 74 | 0  | 0  | 27 | 0 | 6 |
| 573,027 | 573,036 | 10 | 85,953,901 | 85,955,550 | 10q23.1  |        | CDHR1             | 66 | 0  | 0  | 0  | 0 | 0 |
| 574,046 | 574,052 | 7  | 86,106,751 | 86,107,950 | 10q23.1  |        | FAM190B           | 65 | 0  | 0  | 0  | 0 | 0 |
| 575,335 | 575,341 | 7  | 86,300,101 | 86,301,300 | 10q23.1  |        | none              | 64 | 0  | 0  | 0  | 0 | 0 |
| 586,540 | 586,548 | 9  | 87,980,851 | 87,982,350 | 10q23.2  |        | GRID1             | 59 | 0  | 9  | 0  | 0 | 3 |
| 587,420 | 587,426 | 7  | 88,112,851 | 88,114,050 | 10q23.2  |        | GRID1             | 61 | 11 | 0  | 0  | 0 | 0 |
| 587,504 | 587,516 | 13 | 88,125,451 | 88,127,550 | 10q23.2  |        | GRID1             | 73 | 0  | 0  | 0  | 0 | 9 |
| 587,730 | 587,742 | 13 | 88,159,351 | 88,161,450 | 10q23.2  |        | none              | 67 | 12 | 0  | 0  | 0 | 0 |
| 589,393 | 589,400 | 8  | 88,408,801 | 88,410,150 | 10q23.2  |        | none              | 59 | 4  | 0  | 13 | 0 | 2 |
| 589,528 | 589,535 | 8  | 88,429,051 | 88,430,400 | 10q23.2  |        | LDB3              | 60 | 0  | 0  | 11 | 0 | 0 |
| 589,595 | 589,610 | 16 | 88,439,101 | 88,441,650 | 10q23.2  |        | LDB3              | 63 | 5  | 0  | 0  | 0 | 0 |
| 589,626 | 589,633 | 8  | 88,443,751 | 88,445,100 | 10q23.2  |        | LDB3              | 60 | 0  | 17 | 0  | 0 | 0 |
| 589,734 | 589,740 | 7  | 88,459,951 | 88,461,150 | 10q23.2  |        | LDB3              | 60 | 0  | 0  | 0  | 0 | 0 |
| 589,806 | 589,812 | 7  | 88,470,751 | 88,471,950 | 10q23.2  |        | LDB3              | 70 | 0  | 0  | 0  | 0 | 0 |
| 590,103 | 590,113 | 11 | 88,515,301 | 88,517,100 | 10q23.2  |        | BMPR1A            | 70 | 0  | 0  | 0  | 0 | 0 |
| 591,430 | 591,438 | 9  | 88,714,351 | 88,715,850 | 10q23.2  |        | MMRN2             | 60 | 0  | 0  | 0  | 0 | 0 |
| 591,447 | 591,459 | 13 | 88,716,901 | 88,719,000 | 10q23.2  |        | MMRN2, SNCG       | 62 | 0  | 4  | 0  | 0 | 1 |
| 591,537 | 591,547 | 11 | 88,730,401 | 88,732,200 | 10q23.2  |        | AGAP11, C10orf116 | 65 | 0  | 0  | 0  | 0 | 0 |
| 592,358 | 592,368 | 11 | 88,853,551 | 88,855,350 | 10q23.2  |        | GLUD1, FAM35A     | 70 | 0  | 8  | 0  | 0 | 2 |
| 593,155 | 593,162 | 8  | 88,973,101 | 88,974,450 | 10q23.2  |        | none              | 59 | 0  | 0  | 0  | 0 | 0 |
| 593,271 | 593,278 | 8  | 88,990,501 | 88,991,850 | 10q23.2  |        | FAM22A            | 63 | 0  | 0  | 0  | 0 | 0 |
| 594,010 | 594,019 | 10 | 89,101,351 | 89,103,000 | 10q23.2  |        | none              | 71 | 0  | 0  | 0  | 0 | 7 |
| 594,153 | 594,160 | 8  | 89,122,801 | 89,124,150 | 10q23.2  |        | FAM22D            | 63 | 0  | 0  | 0  | 0 | 0 |
| 597,486 | 597,493 | 8  | 89,622,751 | 89,624,100 | 10q23.31 | FRA10A | KILLIN,PTEN       | 70 | 0  | 0  | 0  | 0 | 4 |
| 611,407 | 611,414 | 8  | 91,710,901 | 91,712,250 | 10q23.31 | FRA10A | none              | 56 | 0  | 0  | 0  | 0 | 0 |
| 616,864 | 616,871 | 8  | 92,529,451 | 92,530,800 | 10q23.31 | FRA10A | HTR7              | 60 | 0  | 0  | 85 | 0 | 0 |
| 619,481 | 619,492 | 12 | 92,922,001 | 92,923,950 | 10q23.32 | FRA10A | none              | 71 | 0  | 0  | 0  | 0 | 5 |
| 620,551 | 620,558 | 8  | 93,082,501 | 93,083,850 | 10q23.32 | FRA10A | none              | 67 | 0  | 0  | 0  | 0 | 0 |
| 621,129 | 621,136 | 8  | 93,169,201 | 93,170,550 | 10q23.32 | FRA10A | HECTD2            | 70 | 0  | 0  | 0  | 0 | 0 |
| 627,564 | 627,577 | 14 | 94,134,451 | 94,136,700 | 10q23.33 | FRA10A | none              | 78 | 0  | 0  | 0  | 0 | 0 |
| 628,888 | 628,895 | 8  | 94,333,051 | 94,334,400 | 10q23.33 | FRA10A | IDE               | 69 | 0  | 12 | 0  | 0 | 0 |
| 629,559 | 629,570 | 12 | 94,433,701 | 94,435,650 | 10q23.33 | FRA10A | none              | 74 | 0  | 0  | 0  | 0 | 0 |
| 629,658 | 629,669 | 12 | 94,448,551 | 94,450,500 | 10q23.33 | FRA10A | HHEX              | 71 | 0  | 0  | 0  | 0 | 0 |
| 630,719 | 630,725 | 7  | 94,607,701 | 94,608,900 | 10q23.33 | FRA10A | EXOC6             | 69 | 0  | 0  | 0  | 0 | 0 |
| 632,148 | 632,154 | 7  | 94,822,051 | 94,823,250 | 10q23.33 | FRA10A | CYP25C1           | 68 | 6  | 0  | 0  | 0 | 0 |
| 632,186 | 632,192 | 7  | 94,827,751 | 94,828,950 | 10q23.33 | FRA10A | CYP25C1           | 61 | 0  | 16 | 0  | 0 | 0 |
| 632,210 | 632,216 | 7  | 94,831,351 | 94,832,550 | 10q23.33 | FRA10A | none              | 59 | 0  | 0  | 0  | 0 | 0 |
| 632,220 | 632,227 | 8  | 94,832,851 | 94,834,200 | 10q23.33 | FRA10A | CYP26A1           | 65 | 0  | 5  | 0  | 0 | 0 |
| 635,735 | 635,741 | 7  | 95,360,101 | 95,361,300 | 10q23.33 | FRA10A | RBP4              | 70 | 0  | 0  | 0  | 0 | 3 |
| 641,080 | 641,088 | 9  | 96,161,851 | 96,163,350 | 10q23.33 | FRA10A | TBC1D12           | 68 | 0  | 0  | 0  | 0 | 3 |
| 650,460 | 650,467 | 8  | 97,568,851 | 97,570,200 | 10q24.1  |        | ENTPD1            | 71 | 0  | 0  | 0  | 0 | 0 |
| 652,019 | 652,027 | 9  | 97,802,701 | 97,804,200 | 10q24.1  |        | CCNJ              | 67 | 0  | 0  | 0  | 0 | 0 |
| 655,152 | 655,159 | 8  | 98,272,651 | 98,274,000 | 10q24.1  |        | TLL2              | 67 | 0  | 0  | 0  | 0 | 5 |
| 655,640 | 655,646 | 7  | 98,345,851 | 98,347,050 | 10q24.1  |        | TM9SF3            | 71 | 0  | 0  | 0  | 0 | 8 |
| 657,277 | 657,287 | 11 | 98,591,401 | 98,593,200 | 10q24.1  |        | LCOR              | 72 | 0  | 0  | 0  | 0 | 0 |
| 658,389 | 658,395 | 7  | 98,758,201 | 98,759,400 | 10q24.1  |        | SLIT1             | 59 | 0  | 0  | 0  | 0 | 0 |
| 658,404 | 658,413 | 10 | 98,760,451 | 98,762,100 | 10q24.1  |        | SLIT1             | 62 | 13 | 0  | 0  | 0 | 0 |
| 659,489 | 659,498 | 10 | 98,923,201 | 98,924,850 | 10q24.1  |        | SLIT1             | 60 | 0  | 0  | 22 | 0 | 0 |
| 659,632 | 659,639 | 8  | 98,944,651 | 98,946,000 | 10q24.1  |        | SLIT1             | 69 | 0  | 0  | 0  | 0 | 3 |
| 660,235 | 660,245 | 11 | 99,035,101 | 99,036,900 | 10q24.1  |        | ARHGAP19          | 79 | 0  | 0  | 0  | 0 | 0 |
| 660,525 | 660,533 | 9  | 99,078,601 | 99,080,100 | 10q24.1  |        | FRAT1             | 71 | 0  | 0  | 0  | 0 | 3 |
| 660,623 | 660,632 | 10 | 99,093,301 | 99,094,950 | 10q24.1  |        | FRAT2             | 72 | 0  | 0  | 0  | 0 | 0 |

|         |         |    |             |             |          |        |             |    |    |    |    |   |   |
|---------|---------|----|-------------|-------------|----------|--------|-------------|----|----|----|----|---|---|
| 661,719 | 661,729 | 11 | 99,257,701  | 99,259,500  | 10q24.1  |        | MMS19_UBTD1 | 70 | 0  | 9  | 0  | 0 | 0 |
| 661,918 | 661,927 | 10 | 99,287,551  | 99,289,200  | 10q24.1  |        | UBTD1       | 73 | 0  | 0  | 0  | 0 | 0 |
| 662,199 | 662,205 | 7  | 99,329,701  | 99,330,900  | 10q24.2  | FRA10A | UBTD1       | 62 | 0  | 0  | 13 | 0 | 0 |
| 662,975 | 662,982 | 8  | 99,446,101  | 99,447,450  | 10q24.2  | FRA10A | AVPI1       | 63 | 0  | 15 | 0  | 0 | 0 |
| 663,156 | 663,163 | 8  | 99,473,251  | 99,474,600  | 10q24.2  | FRA10A | MARVELD1    | 72 | 0  | 0  | 0  | 0 | 6 |
| 663,539 | 663,545 | 7  | 99,530,701  | 99,531,900  | 10q24.2  | FRA10A | SFRP5       | 72 | 0  | 0  | 0  | 0 | 2 |
| 663,874 | 663,880 | 7  | 99,580,951  | 99,582,150  | 10q24.2  | FRA10A | none        | 56 | 12 | 0  | 0  | 0 | 0 |
| 665,058 | 665,064 | 7  | 99,758,551  | 99,759,750  | 10q24.2  | FRA10A | CRTAC1      | 56 | 61 | 0  | 0  | 0 | 0 |
| 665,260 | 665,273 | 14 | 99,788,851  | 99,791,100  | 10q24.2  | FRA10A | CRTAC1      | 69 | 0  | 0  | 75 | 0 | 8 |
| 667,845 | 667,852 | 8  | 100,176,601 | 100,177,950 | 10q24.2  | FRA10A | HPS1        | 60 | 0  | 11 | 0  | 7 | 0 |
| 673,925 | 673,935 | 11 | 101,088,601 | 101,090,400 | 10q24.2  | FRA10A | CNNM1       | 67 | 12 | 0  | 0  | 0 | 2 |
| 675,297 | 675,304 | 8  | 101,294,401 | 101,295,750 | 10q24.2  | FRA10A | NKX2-3      | 66 | 0  | 0  | 0  | 0 | 4 |
| 677,318 | 677,334 | 17 | 101,597,551 | 101,600,250 | 10q24.2  | FRA10A | ABCC2       | 76 | 0  | 0  | 0  | 0 | 0 |
| 677,673 | 677,679 | 7  | 101,650,801 | 101,652,000 | 10q24.2  | FRA10A | DNMBP       | 67 | 16 | 0  | 0  | 0 | 0 |
| 679,013 | 679,024 | 12 | 101,851,801 | 101,853,750 | 10q24.2  | FRA10A | none        | 73 | 0  | 7  | 0  | 0 | 6 |
| 680,246 | 680,253 | 8  | 102,036,751 | 102,038,100 | 10q24.31 |        | BLOC1S2     | 78 | 0  | 0  | 0  | 0 | 0 |
| 680,707 | 680,714 | 8  | 102,105,901 | 102,107,250 | 10q24.31 |        | SCD         | 64 | 0  | 19 | 0  | 0 | 0 |
| 682,772 | 682,778 | 7  | 102,415,651 | 102,416,850 | 10q24.31 |        | none        | 66 | 0  | 0  | 0  | 0 | 3 |
| 683,396 | 683,404 | 9  | 102,509,251 | 102,510,750 | 10q24.31 |        | PAX2        | 63 | 0  | 0  | 0  | 0 | 0 |
| 683,906 | 683,913 | 8  | 102,585,751 | 102,587,100 | 10q24.31 |        | none        | 66 | 0  | 0  | 0  | 0 | 0 |
| 684,859 | 684,865 | 7  | 102,728,701 | 102,729,900 | 10q24.31 |        | FAM178A     | 67 | 0  | 0  | 0  | 0 | 0 |
| 685,044 | 685,050 | 7  | 102,756,451 | 102,757,650 | 10q24.31 |        | LZTS2       | 68 | 0  | 0  | 0  | 0 | 2 |
| 685,059 | 685,067 | 9  | 102,758,701 | 102,760,200 | 10q24.31 |        | LZTS2       | 71 | 0  | 0  | 0  | 0 | 3 |
| 685,075 | 685,084 | 10 | 102,761,101 | 102,762,750 | 10q24.31 |        | LZTS2       | 59 | 0  | 0  | 0  | 0 | 0 |
| 685,186 | 685,193 | 8  | 102,777,751 | 102,779,100 | 10q24.31 |        | PDZD7       | 64 | 0  | 10 | 0  | 0 | 0 |
| 685,685 | 685,691 | 7  | 102,852,601 | 102,853,800 | 10q24.31 |        | TLX1NB      | 62 | 22 | 0  | 0  | 0 | 8 |
| 686,036 | 686,043 | 8  | 102,905,251 | 102,906,600 | 10q24.31 |        | none        | 63 | 0  | 0  | 0  | 0 | 0 |
| 688,868 | 688,874 | 7  | 103,330,051 | 103,331,250 | 10q24.32 |        | none        | 66 | 0  | 0  | 0  | 0 | 0 |
| 690,227 | 690,242 | 16 | 103,533,901 | 103,536,450 | 10q24.32 |        | FGF8        | 69 | 0  | 6  | 0  | 0 | 3 |
| 690,260 | 690,272 | 13 | 103,538,851 | 103,540,950 | 10q24.32 |        | C10orf76    | 64 | 0  | 0  | 0  | 0 | 1 |
| 691,967 | 691,973 | 7  | 103,794,901 | 103,796,100 | 10q24.32 |        | none        | 67 | 0  | 24 | 0  | 0 | 0 |
| 692,165 | 692,180 | 16 | 103,824,601 | 103,827,150 | 10q24.32 |        | HPS6        | 66 | 5  | 5  | 0  | 0 | 0 |
| 692,492 | 692,498 | 7  | 103,873,651 | 103,874,850 | 10q24.32 |        | LDB1        | 67 | 0  | 0  | 0  | 0 | 0 |
| 692,531 | 692,537 | 7  | 103,879,501 | 103,880,700 | 10q24.32 |        | LDB1        | 70 | 0  | 0  | 0  | 0 | 4 |
| 692,985 | 692,991 | 7  | 103,947,601 | 103,948,800 | 10q24.32 |        | none        | 56 | 0  | 0  | 87 | 0 | 0 |
| 693,265 | 693,272 | 8  | 103,989,601 | 103,990,950 | 10q24.32 |        | PITX3       | 68 | 0  | 7  | 77 | 0 | 2 |
| 694,393 | 694,401 | 9  | 104,158,801 | 104,160,300 | 10q24.32 |        | NFKB2       | 64 | 0  | 31 | 0  | 0 | 0 |
| 694,415 | 694,421 | 7  | 104,162,101 | 104,163,300 | 10q24.32 |        | NFKB2.PSD   | 64 | 0  | 0  | 0  | 0 | 0 |
| 694,480 | 694,486 | 7  | 104,171,851 | 104,173,050 | 10q24.32 |        | PSD         | 58 | 10 | 0  | 0  | 0 | 0 |
| 694,537 | 694,546 | 10 | 104,180,401 | 104,182,050 | 10q24.32 |        | FBXL15      | 66 | 3  | 0  | 0  | 0 | 0 |
| 694,733 | 694,740 | 8  | 104,209,801 | 104,211,150 | 10q24.32 |        | none        | 69 | 0  | 0  | 0  | 0 | 0 |
| 696,019 | 696,032 | 14 | 104,402,701 | 104,404,950 | 10q24.32 |        | TRIM8       | 69 | 0  | 0  | 0  | 0 | 0 |
| 696,133 | 696,142 | 10 | 104,419,801 | 104,421,450 | 10q24.32 |        | none        | 61 | 0  | 18 | 0  | 0 | 0 |
| 696,492 | 696,500 | 9  | 104,473,651 | 104,475,150 | 10q24.32 |        | ARL3.SFXN2  | 66 | 0  | 21 | 0  | 0 | 2 |
| 697,848 | 697,862 | 15 | 104,677,051 | 104,679,450 | 10q24.32 |        | CNNM2       | 65 | 0  | 0  | 0  | 0 | 2 |
| 699,257 | 699,264 | 8  | 104,888,401 | 104,889,750 | 10q24.32 |        | NT5C2       | 78 | 0  | 0  | 0  | 0 | 0 |
| 699,681 | 699,687 | 7  | 104,952,001 | 104,953,200 | 10q24.33 |        | NT5C2       | 68 | 0  | 0  | 0  | 0 | 5 |
| 700,242 | 700,253 | 12 | 105,036,151 | 105,038,100 | 10q24.33 |        | INA         | 68 | 0  | 0  | 0  | 0 | 0 |
| 700,733 | 700,739 | 7  | 105,109,801 | 105,111,000 | 10q24.33 |        | PCGF6       | 64 | 0  | 48 | 0  | 0 | 0 |
| 701,410 | 701,416 | 7  | 105,211,351 | 105,212,550 | 10q24.33 |        | CALHM2      | 64 | 0  | 0  | 0  | 0 | 6 |
| 701,447 | 701,458 | 12 | 105,216,901 | 105,218,850 | 10q24.33 |        | CALHM1      | 63 | 0  | 0  | 0  | 5 | 0 |
| 701,687 | 701,694 | 8  | 105,252,901 | 105,254,250 | 10q24.33 |        | NEURL       | 70 | 0  | 0  | 0  | 0 | 2 |

|         |         |    |             |             |          |             |           |    |    |    |    |    |   |
|---------|---------|----|-------------|-------------|----------|-------------|-----------|----|----|----|----|----|---|
| 702,343 | 702,349 | 7  | 105,351,301 | 105,352,500 | 10q24.33 |             | NEURL     | 60 | 0  | 10 | 0  | 0  | 0 |
| 702,795 | 702,802 | 8  | 105,419,101 | 105,420,450 | 10q24.33 |             | SH3PXD2A  | 61 | 0  | 0  | 0  | 0  | 0 |
| 702,806 | 702,812 | 7  | 105,420,751 | 105,421,950 | 10q24.33 |             | SH3PXD2A  | 68 | 0  | 0  | 0  | 0  | 0 |
| 702,849 | 702,858 | 10 | 105,427,201 | 105,428,850 | 10q24.33 |             | SH3PXD2A  | 61 | 0  | 7  | 0  | 0  | 0 |
| 704,098 | 704,104 | 7  | 105,614,551 | 105,615,750 | 10q24.33 |             | SH3PXD2A  | 74 | 0  | 0  | 0  | 0  | 0 |
| 705,292 | 705,298 | 7  | 105,793,651 | 105,794,850 | 10q24.33 |             | COL17A1   | 61 | 0  | 0  | 0  | 0  | 0 |
| 707,162 | 707,170 | 9  | 106,074,151 | 106,075,650 | 10q25.1  |             | ITPRIP    | 62 | 0  | 0  | 0  | 0  | 0 |
| 709,330 | 709,336 | 7  | 106,399,351 | 106,400,550 | 10q25.1  |             | SORCS3    | 65 | 0  | 0  | 0  | 0  | 0 |
| 709,340 | 709,348 | 9  | 106,400,851 | 106,402,350 | 10q25.1  |             | SORCS3    | 70 | 0  | 0  | 0  | 0  | 2 |
| 735,507 | 735,513 | 7  | 110,325,901 | 110,327,100 | 10q25.1  |             | none      | 61 | 53 | 0  | 6  | 0  | 0 |
| 745,112 | 745,121 | 10 | 111,766,651 | 111,768,300 | 10q25.1  |             | ADD3      | 67 | 0  | 0  | 35 | 0  | 0 |
| 748,381 | 748,390 | 10 | 112,257,001 | 112,258,650 | 10q25.2  | RA10B/FRA10 | DUSP5     | 71 | 9  | 0  | 0  | 0  | 0 |
| 752,250 | 752,261 | 12 | 112,837,351 | 112,839,300 | 10q25.2  | RA10B/FRA10 | ADRA2A    | 67 | 0  | 0  | 0  | 0  | 0 |
| 756,488 | 756,496 | 9  | 113,473,051 | 113,474,550 | 10q25.2  | RA10B/FRA10 | none      | 60 | 0  | 0  | 0  | 0  | 0 |
| 772,019 | 772,035 | 17 | 115,802,701 | 115,805,400 | 10q25.3  |             | ADRB1     | 71 | 0  | 0  | 77 | 0  | 3 |
| 774,422 | 774,432 | 11 | 116,163,151 | 116,164,950 | 10q25.3  |             | AFAPIL2   | 68 | 0  | 0  | 0  | 0  | 0 |
| 776,850 | 776,856 | 7  | 116,527,351 | 116,528,550 | 10q25.3  |             | none      | 69 | 0  | 0  | 0  | 0  | 0 |
| 777,208 | 777,214 | 7  | 116,581,051 | 116,582,250 | 10q25.3  |             | FAM160B1  | 70 | 0  | 0  | 0  | 0  | 0 |
| 779,015 | 779,026 | 12 | 116,852,101 | 116,854,050 | 10q25.3  |             | ATRNL1    | 71 | 0  | 0  | 0  | 0  | 0 |
| 786,867 | 786,873 | 7  | 118,029,901 | 118,031,100 | 10q25.3  |             | GFRA1     | 67 | 0  | 0  | 0  | 0  | 0 |
| 786,876 | 786,883 | 8  | 118,031,251 | 118,032,600 | 10q25.3  |             | GFRA1     | 67 | 0  | 0  | 0  | 0  | 0 |
| 790,008 | 790,017 | 10 | 118,501,051 | 118,502,700 | 10q25.3  |             | HSPA12A   | 75 | 0  | 0  | 0  | 0  | 2 |
| 791,761 | 791,767 | 7  | 118,764,001 | 118,765,200 | 10q25.3  |             | KIAA1598  | 65 | 0  | 0  | 0  | 0  | 0 |
| 792,661 | 792,668 | 8  | 118,899,001 | 118,900,350 | 10q25.3  |             | none      | 68 | 0  | 0  | 0  | 0  | 0 |
| 792,815 | 792,822 | 8  | 118,922,101 | 118,923,450 | 10q25.3  |             | none      | 67 | 0  | 0  | 0  | 0  | 0 |
| 793,173 | 793,179 | 7  | 118,975,801 | 118,977,000 | 10q25.3  |             | none      | 66 | 0  | 11 | 0  | 0  | 0 |
| 793,331 | 793,341 | 11 | 118,999,501 | 119,001,300 | 10q25.3  |             | SLC18A2   | 68 | 0  | 0  | 0  | 0  | 0 |
| 794,225 | 794,236 | 12 | 119,133,601 | 119,135,550 | 10q26.11 | FRA10F      | PDZD8     | 69 | 0  | 0  | 0  | 0  | 0 |
| 795,293 | 795,301 | 9  | 119,293,801 | 119,295,300 | 10q26.11 | FRA10F      | none      | 67 | 0  | 0  | 0  | 0  | 0 |
| 798,704 | 798,710 | 7  | 119,805,451 | 119,806,650 | 10q26.11 | FRA10F      | RAB11FIP2 | 68 | 0  | 0  | 0  | 0  | 0 |
| 802,357 | 802,363 | 7  | 120,353,401 | 120,354,600 | 10q26.11 | FRA10F      | PRLHR     | 64 | 0  | 0  | 0  | 0  | 0 |
| 803,425 | 803,432 | 8  | 120,513,601 | 120,514,950 | 10q26.11 | FRA10F      | C10orf46  | 67 | 0  | 0  | 0  | 0  | 0 |
| 804,009 | 804,019 | 11 | 120,601,201 | 120,603,000 | 10q26.11 | FRA10F      | none      | 57 | 0  | 0  | 0  | 18 | 0 |
| 805,257 | 805,267 | 11 | 120,788,401 | 120,790,200 | 10q26.11 | FRA10F      | NANOS1    | 75 | 0  | 0  | 0  | 0  | 8 |
| 806,441 | 806,450 | 10 | 120,966,001 | 120,967,650 | 10q26.11 | FRA10F      | GRK5      | 71 | 0  | 0  | 0  | 0  | 4 |
| 808,019 | 808,029 | 11 | 121,202,701 | 121,204,500 | 10q26.11 | FRA10F      | GRK5      | 60 | 14 | 0  | 0  | 0  | 0 |
| 808,674 | 808,686 | 13 | 121,300,951 | 121,303,050 | 10q26.11 | FRA10F      | RGS10     | 68 | 0  | 9  | 0  | 0  | 3 |
| 809,035 | 809,042 | 8  | 121,355,101 | 121,356,450 | 10q26.11 | FRA10F      | TIAL1     | 62 | 0  | 0  | 0  | 0  | 2 |
| 809,403 | 809,411 | 9  | 121,410,301 | 121,411,800 | 10q26.11 | FRA10F      | BAG3      | 70 | 0  | 0  | 0  | 0  | 0 |
| 809,872 | 809,879 | 8  | 121,480,651 | 121,482,000 | 10q26.11 | FRA10F      | none      | 67 | 0  | 22 | 0  | 0  | 2 |
| 810,360 | 810,368 | 9  | 121,553,851 | 121,555,350 | 10q26.11 | FRA10F      | INPP5F    | 71 | 0  | 0  | 0  | 0  | 0 |
| 810,877 | 810,883 | 7  | 121,631,401 | 121,632,600 | 10q26.11 | FRA10F      | MCMBP     | 71 | 0  | 0  | 0  | 0  | 6 |
| 814,772 | 814,783 | 12 | 122,215,651 | 122,217,600 | 10q26.12 | FRA10F      | PPAPDC1A  | 67 | 0  | 0  | 0  | 0  | 0 |
| 818,056 | 818,062 | 7  | 122,708,251 | 122,709,450 | 10q26.12 | FRA10F      | none      | 59 | 84 | 10 | 0  | 0  | 0 |
| 822,377 | 822,387 | 11 | 123,356,401 | 123,358,200 | 10q26.13 | FRA10F      | FGFR2     | 69 | 0  | 0  | 0  | 0  | 2 |
| 824,580 | 824,587 | 8  | 123,686,851 | 123,688,200 | 10q26.13 | FRA10F      | ATE1      | 69 | 0  | 5  | 0  | 0  | 0 |
| 824,892 | 824,899 | 8  | 123,733,651 | 123,735,000 | 10q26.13 | FRA10F      | NSMCE4A   | 66 | 0  | 0  | 0  | 11 | 0 |
| 825,641 | 825,648 | 8  | 123,846,001 | 123,847,350 | 10q26.13 | FRA10F      | TACC2     | 61 | 0  | 0  | 0  | 0  | 0 |
| 825,813 | 825,821 | 9  | 123,871,801 | 123,873,300 | 10q26.13 | FRA10F      | TACC2     | 65 | 0  | 0  | 0  | 0  | 0 |
| 826,149 | 826,158 | 10 | 123,922,201 | 123,923,850 | 10q26.13 | FRA10F      | TACC2     | 66 | 0  | 0  | 0  | 0  | 0 |
| 826,397 | 826,406 | 10 | 123,959,401 | 123,961,050 | 10q26.13 | FRA10F      | TACC2     | 61 | 0  | 0  | 22 | 0  | 0 |
| 827,559 | 827,565 | 7  | 124,133,701 | 124,134,900 | 10q26.13 | FRA10F      | PLEKHA1   | 69 | 0  | 0  | 0  | 0  | 0 |

|         |         |    |             |             |          |        |               |    |    |    |    |    |    |
|---------|---------|----|-------------|-------------|----------|--------|---------------|----|----|----|----|----|----|
| 828,133 | 828,145 | 13 | 124,219,801 | 124,221,900 | 10q26.13 | FRA10F | HTRA1         | 68 | 0  | 0  | 0  | 0  | 1  |
| 832,630 | 832,638 | 9  | 124,894,351 | 124,895,850 | 10q26.13 | FRA10F | HXM3          | 69 | 0  | 0  | 0  | 0  | 2  |
| 832,641 | 832,648 | 8  | 124,896,001 | 124,897,350 | 10q26.13 | FRA10F | HXM3          | 68 | 0  | 0  | 0  | 0  | 0  |
| 834,719 | 834,725 | 7  | 125,207,701 | 125,208,900 | 10q26.13 | FRA10F | none          | 51 | 0  | 85 | 0  | 0  | 2  |
| 836,170 | 836,176 | 7  | 125,425,351 | 125,426,550 | 10q26.13 | FRA10F | GPR26         | 71 | 0  | 0  | 0  | 0  | 0  |
| 838,340 | 838,346 | 7  | 125,750,851 | 125,752,050 | 10q26.13 | FRA10F | none          | 64 | 0  | 26 | 0  | 0  | 15 |
| 838,626 | 838,632 | 7  | 125,793,751 | 125,794,950 | 10q26.13 | FRA10F | CHST15        | 63 | 0  | 0  | 0  | 0  | 0  |
| 839,011 | 839,021 | 11 | 125,851,501 | 125,853,300 | 10q26.13 | FRA10F | CHST15        | 72 | 0  | 0  | 0  | 0  | 2  |
| 840,514 | 840,520 | 7  | 126,076,951 | 126,078,150 | 10q26.13 | FRA10F | none          | 65 | 0  | 0  | 12 | 0  | 0  |
| 840,712 | 840,718 | 7  | 126,106,651 | 126,107,850 | 10q26.13 | FRA10F | OAT           | 69 | 0  | 0  | 0  | 0  | 0  |
| 840,904 | 840,910 | 7  | 126,135,451 | 126,136,650 | 10q26.13 | FRA10F | NKX1-2        | 68 | 0  | 0  | 0  | 0  | 6  |
| 841,507 | 841,513 | 7  | 126,225,901 | 126,227,100 | 10q26.13 | FRA10F | LHPP          | 62 | 0  | 5  | 0  | 0  | 0  |
| 841,533 | 841,541 | 9  | 126,229,801 | 126,231,300 | 10q26.13 | FRA10F | LHPP          | 60 | 0  | 11 | 0  | 0  | 0  |
| 841,594 | 841,603 | 10 | 126,238,951 | 126,240,600 | 10q26.13 | FRA10F | LHPP          | 66 | 0  | 8  | 0  | 0  | 0  |
| 841,749 | 841,755 | 7  | 126,262,201 | 126,263,400 | 10q26.13 | FRA10F | LHPP          | 61 | 0  | 4  | 0  | 0  | 0  |
| 841,906 | 841,912 | 7  | 126,285,751 | 126,286,950 | 10q26.13 | FRA10F | LHPP          | 61 | 22 | 7  | 45 | 0  | 0  |
| 841,943 | 841,959 | 17 | 126,291,301 | 126,294,000 | 10q26.13 | FRA10F | LHPP          | 64 | 4  | 0  | 0  | 0  | 0  |
| 842,029 | 842,036 | 8  | 126,304,201 | 126,305,550 | 10q26.13 | FRA10F | none          | 61 | 29 | 35 | 0  | 0  | 0  |
| 842,093 | 842,099 | 7  | 126,313,801 | 126,315,000 | 10q26.13 | FRA10F | FAM53B        | 62 | 0  | 0  | 0  | 0  | 0  |
| 842,264 | 842,270 | 7  | 126,339,451 | 126,340,650 | 10q26.13 | FRA10F | FAM53B        | 60 | 10 | 0  | 27 | 0  | 0  |
| 842,874 | 842,887 | 14 | 126,430,951 | 126,433,200 | 10q26.13 | FRA10F | FAM53B        | 66 | 0  | 0  | 0  | 0  | 2  |
| 844,034 | 844,040 | 7  | 126,604,951 | 126,606,150 | 10q26.13 | FRA10F | none          | 72 | 0  | 0  | 0  | 0  | 3  |
| 844,581 | 844,587 | 7  | 126,687,001 | 126,688,200 | 10q26.13 | FRA10F | CTBP2         | 59 | 0  | 0  | 0  | 0  | 0  |
| 844,601 | 844,616 | 16 | 126,690,001 | 126,692,550 | 10q26.13 | FRA10F | CTBP2         | 63 | 0  | 0  | 0  | 0  | 0  |
| 844,764 | 844,773 | 10 | 126,714,451 | 126,716,100 | 10q26.13 | FRA10F | CTBP2         | 65 | 0  | 0  | 0  | 0  | 0  |
| 845,648 | 845,659 | 12 | 126,847,051 | 126,849,000 | 10q26.13 | FRA10F | CTBP2         | 72 | 0  | 0  | 0  | 0  | 5  |
| 845,663 | 845,672 | 10 | 126,849,301 | 126,850,950 | 10q26.13 | FRA10F | C10orf137     | 68 | 0  | 0  | 0  | 0  | 0  |
| 849,383 | 849,390 | 8  | 127,407,301 | 127,408,650 | 10q26.13 | FRA10F | none          | 61 | 0  | 0  | 0  | 30 | 0  |
| 849,746 | 849,752 | 7  | 127,461,751 | 127,462,950 | 10q26.13 | FRA10F | MMP21         | 69 | 0  | 0  | 0  | 0  | 0  |
| 849,756 | 849,762 | 7  | 127,463,251 | 127,464,450 | 10q26.13 | FRA10F | MMP21         | 64 | 0  | 0  | 0  | 0  | 0  |
| 850,562 | 850,568 | 7  | 127,584,151 | 127,585,350 | 10q26.2  |        | FANK1         | 70 | 0  | 0  | 0  | 0  | 4  |
| 853,840 | 853,848 | 9  | 128,075,851 | 128,077,350 | 10q26.2  |        | ADAM12        | 66 | 0  | 0  | 0  | 0  | 0  |
| 857,289 | 857,299 | 11 | 128,593,201 | 128,595,000 | 10q26.2  |        | none          | 71 | 4  | 0  | 0  | 0  | 0  |
| 859,959 | 859,968 | 10 | 128,993,701 | 128,995,350 | 10q26.2  |        | DOCK1,FAM196A | 72 | 0  | 0  | 0  | 0  | 5  |
| 863,562 | 863,574 | 13 | 129,534,151 | 129,536,250 | 10q26.2  |        | FOXI2         | 68 | 0  | 0  | 0  | 0  | 0  |
| 863,579 | 863,585 | 7  | 129,536,701 | 129,537,900 | 10q26.2  |        | FOXI2         | 66 | 0  | 0  | 0  | 0  | 0  |
| 864,699 | 864,707 | 9  | 129,704,701 | 129,706,200 | 10q26.2  |        | PTPRE         | 71 | 0  | 0  | 0  | 0  | 0  |
| 866,720 | 866,730 | 11 | 130,007,851 | 130,009,650 | 10q26.2  |        | none          | 67 | 1  | 25 | 0  | 0  | 3  |
| 867,108 | 867,114 | 7  | 130,066,051 | 130,067,250 | 10q26.2  |        | none          | 60 | 0  | 0  | 0  | 0  | 0  |
| 871,851 | 871,857 | 7  | 130,777,501 | 130,778,700 | 10q26.3  |        | none          | 59 | 0  | 0  | 0  | 0  | 0  |
| 875,098 | 875,105 | 8  | 131,264,551 | 131,265,900 | 10q26.3  |        | MGMT          | 69 | 0  | 0  | 30 | 0  | 0  |
| 875,461 | 875,467 | 7  | 131,319,001 | 131,320,200 | 10q26.3  |        | MGMT          | 62 | 0  | 3  | 0  | 0  | 0  |
| 877,050 | 877,056 | 7  | 131,557,351 | 131,558,550 | 10q26.3  |        | MGMT          | 59 | 8  | 0  | 0  | 0  | 0  |
| 877,148 | 877,157 | 10 | 131,572,051 | 131,573,700 | 10q26.3  |        | none          | 61 | 0  | 0  | 0  | 0  | 0  |
| 877,427 | 877,434 | 8  | 131,613,901 | 131,615,250 | 10q26.3  |        | none          | 63 | 0  | 0  | 0  | 0  | 0  |
| 878,379 | 878,390 | 12 | 131,756,701 | 131,758,650 | 10q26.3  |        | EBF3          | 66 | 0  | 0  | 0  | 0  | 0  |
| 878,409 | 878,424 | 16 | 131,761,201 | 131,763,750 | 10q26.3  |        | EBF3          | 70 | 0  | 0  | 0  | 0  | 6  |
| 878,441 | 878,453 | 13 | 131,766,001 | 131,768,100 | 10q26.3  |        | none          | 64 | 0  | 0  | 0  | 0  | 0  |
| 878,471 | 878,477 | 7  | 131,770,501 | 131,771,700 | 10q26.3  |        | none          | 70 | 0  | 0  | 0  | 0  | 0  |
| 879,919 | 879,928 | 10 | 131,987,701 | 131,989,350 | 10q26.3  |        | none          | 70 | 0  | 19 | 0  | 6  | 0  |
| 879,989 | 879,997 | 9  | 131,998,201 | 131,999,700 | 10q26.3  |        | none          | 63 | 0  | 0  | 8  | 0  | 0  |
| 880,657 | 880,666 | 10 | 132,098,401 | 132,100,050 | 10q26.3  |        | none          | 68 | 0  | 0  | 0  | 0  | 12 |



|         |         |    |             |             |         |  |          |    |    |    |     |    |    |
|---------|---------|----|-------------|-------------|---------|--|----------|----|----|----|-----|----|----|
| 883,837 | 883,843 | 7  | 132,575,401 | 132,576,600 | 10q26.3 |  | none     | 56 | 0  | 0  | 0   | 0  | 0  |
| 885,197 | 885,203 | 7  | 132,779,401 | 132,780,600 | 10q26.3 |  | none     | 10 | 92 | 0  | 0   | 0  | 0  |
| 886,159 | 886,165 | 7  | 132,923,701 | 132,924,900 | 10q26.3 |  | TCERGIL  | 57 | 0  | 0  | 0   | 0  | 13 |
| 886,779 | 886,786 | 8  | 133,016,701 | 133,018,050 | 10q26.3 |  | TCERGIL  | 61 | 0  | 11 | 0   | 0  | 0  |
| 886,789 | 886,796 | 8  | 133,018,201 | 133,019,550 | 10q26.3 |  | TCERGIL  | 64 | 0  | 0  | 0   | 0  | 0  |
| 886,864 | 886,870 | 7  | 133,029,451 | 133,030,650 | 10q26.3 |  | TCERGIL  | 59 | 7  | 0  | 12  | 0  | 0  |
| 887,099 | 887,109 | 11 | 133,064,701 | 133,066,500 | 10q26.3 |  | TCERGIL  | 61 | 0  | 0  | 69  | 6  | 0  |
| 887,394 | 887,406 | 13 | 133,108,951 | 133,111,050 | 10q26.3 |  | TCERGIL  | 74 | 0  | 0  | 13  | 0  | 8  |
| 889,672 | 889,679 | 8  | 133,450,651 | 133,452,000 | 10q26.3 |  | none     | 60 | 0  | 0  | 28  | 0  | 0  |
| 889,911 | 889,917 | 7  | 133,486,501 | 133,487,700 | 10q26.3 |  | none     | 62 | 0  | 0  | 0   | 0  | 3  |
| 890,530 | 890,537 | 8  | 133,579,351 | 133,580,700 | 10q26.3 |  | none     | 59 | 8  | 11 | 0   | 0  | 0  |
| 890,542 | 890,548 | 7  | 133,581,151 | 133,582,350 | 10q26.3 |  | none     | 64 | 0  | 0  | 0   | 0  | 11 |
| 891,156 | 891,166 | 11 | 133,673,251 | 133,675,050 | 10q26.3 |  | none     | 63 | 0  | 0  | 0   | 14 | 20 |
| 891,965 | 891,975 | 11 | 133,794,601 | 133,796,400 | 10q26.3 |  | BNIP3    | 70 | 0  | 0  | 0   | 0  | 0  |
| 892,216 | 892,222 | 7  | 133,832,251 | 133,833,450 | 10q26.3 |  | none     | 61 | 0  | 0  | 100 | 0  | 0  |
| 893,027 | 893,033 | 7  | 133,953,901 | 133,955,100 | 10q26.3 |  | JAKMIP3  | 62 | 0  | 0  | 0   | 0  | 0  |
| 893,036 | 893,043 | 8  | 133,955,251 | 133,956,600 | 10q26.3 |  | JAKMIP3  | 67 | 0  | 0  | 0   | 0  | 0  |
| 893,065 | 893,074 | 10 | 133,959,601 | 133,961,250 | 10q26.3 |  | JAKMIP3  | 60 | 0  | 0  | 0   | 0  | 2  |
| 893,213 | 893,228 | 16 | 133,981,801 | 133,984,350 | 10q26.3 |  | JAKMIP3  | 66 | 0  | 0  | 0   | 0  | 0  |
| 893,325 | 893,343 | 19 | 133,998,601 | 134,001,600 | 10q26.3 |  | DPYSL4   | 72 | 0  | 0  | 0   | 0  | 4  |
| 893,394 | 893,403 | 10 | 134,008,951 | 134,010,600 | 10q26.3 |  | DPYSL4   | 63 | 0  | 0  | 0   | 0  | 0  |
| 893,407 | 893,419 | 13 | 134,010,901 | 134,013,000 | 10q26.3 |  | DPYSL4   | 65 | 0  | 0  | 0   | 0  | 0  |
| 893,422 | 893,430 | 9  | 134,013,151 | 134,014,650 | 10q26.3 |  | DPYSL4   | 67 | 0  | 0  | 0   | 0  | 0  |
| 893,436 | 893,453 | 18 | 134,015,251 | 134,018,100 | 10q26.3 |  | DPYSL4   | 64 | 0  | 0  | 0   | 0  | 0  |
| 893,473 | 893,481 | 9  | 134,020,801 | 134,022,300 | 10q26.3 |  | STK32C   | 65 | 5  | 0  | 0   | 0  | 0  |
| 893,574 | 893,588 | 15 | 134,035,951 | 134,038,350 | 10q26.3 |  | STK32C   | 66 | 0  | 0  | 0   | 0  | 0  |
| 893,621 | 893,631 | 11 | 134,043,001 | 134,044,800 | 10q26.3 |  | STK32C   | 63 | 0  | 8  | 5   | 0  | 0  |
| 893,799 | 893,814 | 16 | 134,069,701 | 134,072,250 | 10q26.3 |  | STK32C   | 64 | 0  | 0  | 0   | 0  | 0  |
| 893,873 | 893,879 | 7  | 134,080,801 | 134,082,000 | 10q26.3 |  | STK32C   | 52 | 0  | 0  | 0   | 0  | 79 |
| 893,882 | 893,889 | 8  | 134,082,151 | 134,083,500 | 10q26.3 |  | STK32C   | 58 | 0  | 0  | 0   | 0  | 53 |
| 893,975 | 893,981 | 7  | 134,096,101 | 134,097,300 | 10q26.3 |  | STK32C   | 59 | 0  | 0  | 0   | 0  | 0  |
| 894,135 | 894,149 | 15 | 134,120,101 | 134,122,500 | 10q26.3 |  | STK32C   | 70 | 0  | 0  | 0   | 0  | 6  |
| 894,300 | 894,306 | 7  | 134,144,851 | 134,146,050 | 10q26.3 |  | LRRC27   | 69 | 0  | 0  | 11  | 0  | 0  |
| 894,682 | 894,690 | 9  | 134,202,151 | 134,203,650 | 10q26.3 |  | none     | 69 | 0  | 0  | 0   | 0  | 0  |
| 894,726 | 894,743 | 18 | 134,208,751 | 134,211,600 | 10q26.3 |  | PWWP2B   | 74 | 0  | 0  | 0   | 0  | 3  |
| 894,750 | 894,763 | 14 | 134,212,351 | 134,214,600 | 10q26.3 |  | PWWP2B   | 64 | 2  | 0  | 0   | 0  | 0  |
| 894,767 | 894,773 | 7  | 134,214,901 | 134,216,100 | 10q26.3 |  | PWWP2B   | 63 | 0  | 7  | 0   | 0  | 0  |
| 894,779 | 894,795 | 17 | 134,216,701 | 134,219,400 | 10q26.3 |  | PWWP2B   | 67 | 0  | 0  | 0   | 0  | 0  |
| 894,799 | 894,810 | 12 | 134,219,701 | 134,221,650 | 10q26.3 |  | PWWP2B   | 64 | 0  | 0  | 0   | 0  | 0  |
| 894,813 | 894,819 | 7  | 134,221,801 | 134,223,000 | 10q26.3 |  | PWWP2B   | 67 | 0  | 0  | 0   | 0  | 0  |
| 894,825 | 894,833 | 9  | 134,223,601 | 134,225,100 | 10q26.3 |  | PWWP2B   | 65 | 0  | 0  | 10  | 0  | 0  |
| 894,863 | 894,877 | 15 | 134,229,301 | 134,231,700 | 10q26.3 |  | PWWP2B   | 64 | 0  | 0  | 4   | 0  | 0  |
| 894,880 | 894,890 | 11 | 134,231,851 | 134,233,650 | 10q26.3 |  | none     | 65 | 0  | 0  | 0   | 3  | 0  |
| 894,897 | 894,906 | 10 | 134,234,401 | 134,236,050 | 10q26.3 |  | none     | 66 | 9  | 0  | 0   | 0  | 2  |
| 894,950 | 894,956 | 7  | 134,242,351 | 134,243,550 | 10q26.3 |  | none     | 65 | 0  | 0  | 0   | 0  | 0  |
| 894,995 | 895,007 | 13 | 134,249,101 | 134,251,200 | 10q26.3 |  | none     | 60 | 0  | 0  | 2   | 6  | 9  |
| 895,062 | 895,073 | 12 | 134,259,151 | 134,261,100 | 10q26.3 |  | C10orf91 | 66 | 0  | 0  | 0   | 0  | 0  |
| 895,093 | 895,114 | 22 | 134,263,801 | 134,267,250 | 10q26.3 |  | none     | 65 | 0  | 5  | 0   | 0  | 10 |
| 895,126 | 895,138 | 13 | 134,268,751 | 134,270,850 | 10q26.3 |  | none     | 63 | 0  | 0  | 0   | 0  | 0  |
| 895,172 | 895,186 | 15 | 134,275,651 | 134,278,050 | 10q26.3 |  | none     | 65 | 0  | 0  | 0   | 0  | 0  |
| 895,202 | 895,210 | 9  | 134,280,151 | 134,281,650 | 10q26.3 |  | none     | 65 | 0  | 0  | 0   | 0  | 0  |
| 895,273 | 895,282 | 10 | 134,290,801 | 134,292,450 | 10q26.3 |  | none     | 66 | 0  | 0  | 0   | 0  | 0  |

|         |         |    |             |             |         |  |        |    |    |    |    |    |    |
|---------|---------|----|-------------|-------------|---------|--|--------|----|----|----|----|----|----|
| 895,341 | 895,347 | 7  | 134,301,001 | 134,302,200 | 10q26.3 |  | none   | 63 | 0  | 0  | 54 | 0  | 0  |
| 895,533 | 895,540 | 8  | 134,329,801 | 134,331,150 | 10q26.3 |  | none   | 62 | 0  | 0  | 0  | 0  | 13 |
| 895,668 | 895,677 | 10 | 134,350,051 | 134,351,700 | 10q26.3 |  | INPP5A | 73 | 0  | 0  | 0  | 15 | 11 |
| 895,836 | 895,844 | 9  | 134,375,251 | 134,376,750 | 10q26.3 |  | INPP5A | 61 | 0  | 0  | 8  | 0  | 3  |
| 896,426 | 896,432 | 7  | 134,463,751 | 134,464,950 | 10q26.3 |  | INPP5A | 63 | 0  | 0  | 0  | 0  | 0  |
| 896,466 | 896,473 | 8  | 134,469,751 | 134,471,100 | 10q26.3 |  | INPP5A | 64 | 0  | 0  | 0  | 0  | 0  |
| 896,480 | 896,489 | 10 | 134,471,851 | 134,473,500 | 10q26.3 |  | INPP5A | 59 | 2  | 0  | 0  | 0  | 0  |
| 896,750 | 896,760 | 11 | 134,512,351 | 134,514,150 | 10q26.3 |  | INPP5A | 64 | 0  | 0  | 0  | 0  | 0  |
| 896,847 | 896,853 | 7  | 134,526,901 | 134,528,100 | 10q26.3 |  | INPP5A | 66 | 0  | 0  | 0  | 0  | 0  |
| 896,948 | 896,954 | 7  | 134,542,051 | 134,543,250 | 10q26.3 |  | INPP5A | 62 | 0  | 0  | 0  | 0  | 0  |
| 896,962 | 896,969 | 8  | 134,544,151 | 134,545,500 | 10q26.3 |  | INPP5A | 60 | 0  | 0  | 0  | 0  | 0  |
| 896,995 | 897,004 | 10 | 134,549,101 | 134,550,750 | 10q26.3 |  | INPP5A | 61 | 0  | 0  | 0  | 0  | 0  |
| 897,055 | 897,063 | 9  | 134,558,101 | 134,559,600 | 10q26.3 |  | INPP5A | 64 | 0  | 0  | 0  | 0  | 0  |
| 897,140 | 897,148 | 9  | 134,570,851 | 134,572,350 | 10q26.3 |  | INPP5A | 65 | 0  | 0  | 0  | 79 | 1  |
| 897,153 | 897,159 | 7  | 134,572,801 | 134,574,000 | 10q26.3 |  | INPP5A | 65 | 0  | 0  | 0  | 0  | 0  |
| 897,179 | 897,187 | 9  | 134,576,701 | 134,578,200 | 10q26.3 |  | INPP5A | 57 | 0  | 0  | 0  | 0  | 35 |
| 897,258 | 897,270 | 13 | 134,588,551 | 134,590,650 | 10q26.3 |  | INPP5A | 64 | 0  | 0  | 0  | 0  | 0  |
| 897,281 | 897,290 | 10 | 134,592,001 | 134,593,650 | 10q26.3 |  | INPP5A | 62 | 0  | 0  | 0  | 0  | 0  |
| 897,316 | 897,354 | 39 | 134,597,251 | 134,603,250 | 10q26.3 |  | NKX6-2 | 71 | 0  | 0  | 0  | 0  | 1  |
| 897,363 | 897,375 | 13 | 134,604,301 | 134,606,400 | 10q26.3 |  | none   | 64 | 0  | 0  | 0  | 0  | 0  |
| 897,379 | 897,395 | 17 | 134,606,701 | 134,609,400 | 10q26.3 |  | none   | 66 | 0  | 0  | 0  | 0  | 0  |
| 897,415 | 897,424 | 10 | 134,612,101 | 134,613,750 | 10q26.3 |  | none   | 66 | 0  | 0  | 8  | 0  | 0  |
| 897,430 | 897,436 | 7  | 134,614,351 | 134,615,550 | 10q26.3 |  | none   | 67 | 0  | 0  | 55 | 0  | 0  |
| 897,477 | 897,487 | 11 | 134,621,401 | 134,623,200 | 10q26.3 |  | TTC40  | 65 | 0  | 0  | 0  | 0  | 8  |
| 897,490 | 897,509 | 20 | 134,623,351 | 134,626,500 | 10q26.3 |  | TTC40  | 66 | 0  | 0  | 0  | 0  | 0  |
| 897,651 | 897,660 | 10 | 134,647,501 | 134,649,150 | 10q26.3 |  | TTC40  | 63 | 0  | 0  | 0  | 0  | 0  |
| 897,728 | 897,740 | 13 | 134,659,051 | 134,661,150 | 10q26.3 |  | TTC40  | 64 | 0  | 0  | 0  | 0  | 0  |
| 897,830 | 897,837 | 8  | 134,674,351 | 134,675,700 | 10q26.3 |  | TTC40  | 63 | 0  | 0  | 0  | 0  | 0  |
| 897,952 | 897,962 | 11 | 134,692,651 | 134,694,450 | 10q26.3 |  | TTC40  | 65 | 13 | 0  | 0  | 0  | 5  |
| 898,077 | 898,089 | 13 | 134,711,401 | 134,713,500 | 10q26.3 |  | TTC40  | 65 | 4  | 0  | 0  | 0  | 0  |
| 898,152 | 898,159 | 8  | 134,722,651 | 134,724,000 | 10q26.3 |  | TTC40  | 63 | 0  | 0  | 0  | 0  | 0  |
| 898,180 | 898,188 | 9  | 134,726,851 | 134,728,350 | 10q26.3 |  | TTC40  | 68 | 0  | 13 | 0  | 25 | 0  |
| 898,213 | 898,228 | 16 | 134,731,801 | 134,734,350 | 10q26.3 |  | TTC40  | 64 | 0  | 0  | 0  | 0  | 0  |
| 898,231 | 898,247 | 17 | 134,734,501 | 134,737,200 | 10q26.3 |  | TTC40  | 66 | 0  | 0  | 11 | 0  | 0  |
| 898,475 | 898,483 | 9  | 134,771,101 | 134,772,600 | 10q26.3 |  | none   | 62 | 0  | 0  | 0  | 0  | 0  |
| 898,486 | 898,496 | 11 | 134,772,751 | 134,774,550 | 10q26.3 |  | none   | 66 | 0  | 0  | 0  | 0  | 0  |
| 898,574 | 898,584 | 11 | 134,785,951 | 134,787,750 | 10q26.3 |  | none   | 65 | 0  | 0  | 0  | 0  | 0  |
| 898,702 | 898,712 | 11 | 134,805,151 | 134,806,950 | 10q26.3 |  | none   | 64 | 0  | 0  | 0  | 0  | 0  |
| 898,802 | 898,808 | 7  | 134,820,151 | 134,821,350 | 10q26.3 |  | none   | 64 | 0  | 0  | 18 | 0  | 0  |
| 898,871 | 898,880 | 10 | 134,830,501 | 134,832,150 | 10q26.3 |  | none   | 63 | 0  | 0  | 0  | 0  | 10 |
| 898,891 | 898,898 | 8  | 134,833,501 | 134,834,850 | 10q26.3 |  | none   | 65 | 0  | 12 | 0  | 0  | 0  |
| 898,967 | 898,975 | 9  | 134,844,901 | 134,846,400 | 10q26.3 |  | none   | 64 | 22 | 0  | 0  | 0  | 0  |
| 899,016 | 899,025 | 10 | 134,852,251 | 134,853,900 | 10q26.3 |  | none   | 62 | 0  | 0  | 0  | 0  | 0  |
| 899,087 | 899,095 | 9  | 134,862,901 | 134,864,400 | 10q26.3 |  | none   | 64 | 0  | 0  | 0  | 0  | 0  |
| 899,125 | 899,131 | 7  | 134,868,601 | 134,869,800 | 10q26.3 |  | none   | 58 | 0  | 30 | 0  | 0  | 0  |
| 899,157 | 899,163 | 7  | 134,873,401 | 134,874,600 | 10q26.3 |  | none   | 65 | 0  | 0  | 0  | 0  | 0  |
| 899,234 | 899,240 | 7  | 134,884,951 | 134,886,150 | 10q26.3 |  | none   | 66 | 0  | 0  | 0  | 0  | 0  |
| 899,254 | 899,260 | 7  | 134,887,951 | 134,889,150 | 10q26.3 |  | none   | 63 | 0  | 0  | 0  | 0  | 0  |
| 899,300 | 899,309 | 10 | 134,894,851 | 134,896,500 | 10q26.3 |  | none   | 63 | 0  | 0  | 0  | 0  | 0  |
| 899,325 | 899,336 | 12 | 134,898,601 | 134,900,550 | 10q26.3 |  | none   | 63 | 0  | 0  | 0  | 0  | 0  |
| 899,341 | 899,353 | 13 | 134,901,001 | 134,903,100 | 10q26.3 |  | GPR123 | 69 | 0  | 0  | 0  | 0  | 0  |
| 899,390 | 899,397 | 8  | 134,908,351 | 134,909,700 | 10q26.3 |  | GPR123 | 64 | 0  | 0  | 9  | 0  | 0  |

|         |         |    |             |             |         |  |                 |    |    |    |    |    |    |
|---------|---------|----|-------------|-------------|---------|--|-----------------|----|----|----|----|----|----|
| 899,404 | 899,411 | 8  | 134,910,451 | 134,911,800 | 10q26.3 |  | GPR123          | 61 | 0  | 0  | 26 | 0  | 0  |
| 899,438 | 899,449 | 12 | 134,915,551 | 134,917,500 | 10q26.3 |  | GPR123          | 65 | 0  | 0  | 0  | 0  | 0  |
| 899,512 | 899,518 | 7  | 134,926,651 | 134,927,850 | 10q26.3 |  | GPR123          | 63 | 0  | 0  | 0  | 0  | 0  |
| 899,536 | 899,543 | 8  | 134,930,251 | 134,931,600 | 10q26.3 |  | GPR123          | 64 | 0  | 0  | 0  | 0  | 0  |
| 899,599 | 899,606 | 8  | 134,939,701 | 134,941,050 | 10q26.3 |  | GPR123          | 65 | 12 | 0  | 0  | 0  | 0  |
| 899,612 | 899,619 | 8  | 134,941,651 | 134,943,000 | 10q26.3 |  | GPR123          | 70 | 0  | 0  | 0  | 0  | 0  |
| 899,696 | 899,704 | 9  | 134,954,251 | 134,955,750 | 10q26.3 |  | none            | 66 | 0  | 0  | 0  | 0  | 0  |
| 899,814 | 899,836 | 23 | 134,971,951 | 134,975,550 | 10q26.3 |  | KNDC1           | 69 | 1  | 0  | 0  | 0  | 1  |
| 899,848 | 899,864 | 17 | 134,977,051 | 134,979,750 | 10q26.3 |  | KNDC1           | 63 | 3  | 0  | 0  | 0  | 5  |
| 899,870 | 899,876 | 7  | 134,980,351 | 134,981,550 | 10q26.3 |  | KNDC1           | 66 | 0  | 0  | 0  | 0  | 2  |
| 899,951 | 899,958 | 8  | 134,992,501 | 134,993,850 | 10q26.3 |  | KNDC1           | 60 | 22 | 0  | 0  | 0  | 0  |
| 899,974 | 899,980 | 7  | 134,995,951 | 134,997,150 | 10q26.3 |  | KNDC1           | 66 | 0  | 13 | 0  | 0  | 0  |
| 900,057 | 900,074 | 18 | 135,008,401 | 135,011,250 | 10q26.3 |  | KNDC1           | 63 | 0  | 5  | 13 | 27 | 0  |
| 900,078 | 900,085 | 8  | 135,011,551 | 135,012,900 | 10q26.3 |  | KNDC1           | 71 | 0  | 0  | 0  | 0  | 0  |
| 900,088 | 900,102 | 15 | 135,013,051 | 135,015,450 | 10q26.3 |  | KNDC1           | 68 | 0  | 0  | 0  | 0  | 0  |
| 900,115 | 900,121 | 7  | 135,017,101 | 135,018,300 | 10q26.3 |  | KNDC1           | 61 | 0  | 0  | 0  | 12 | 0  |
| 900,131 | 900,144 | 14 | 135,019,501 | 135,021,750 | 10q26.3 |  | KNDC1           | 62 | 0  | 14 | 0  | 0  | 0  |
| 900,161 | 900,170 | 10 | 135,024,001 | 135,025,650 | 10q26.3 |  | KNDC1           | 65 | 0  | 0  | 0  | 0  | 0  |
| 900,175 | 900,182 | 8  | 135,026,101 | 135,027,450 | 10q26.3 |  | KNDC1           | 66 | 0  | 0  | 0  | 0  | 21 |
| 900,216 | 900,228 | 13 | 135,032,251 | 135,034,350 | 10q26.3 |  | KNDC1           | 68 | 0  | 0  | 0  | 0  | 0  |
| 900,287 | 900,299 | 13 | 135,042,901 | 135,045,000 | 10q26.3 |  | UTF1            | 74 | 24 | 0  | 0  | 0  | 2  |
| 900,330 | 900,345 | 16 | 135,049,351 | 135,051,900 | 10q26.3 |  | VENTX           | 71 | 0  | 0  | 0  | 0  | 0  |
| 900,364 | 900,371 | 8  | 135,054,451 | 135,055,800 | 10q26.3 |  | VENTX           | 59 | 0  | 0  | 0  | 0  | 0  |
| 900,379 | 900,386 | 8  | 135,056,701 | 135,058,050 | 10q26.3 |  | none            | 60 | 0  | 0  | 0  | 0  | 14 |
| 900,390 | 900,397 | 8  | 135,058,351 | 135,059,700 | 10q26.3 |  | none            | 63 | 0  | 22 | 0  | 0  | 0  |
| 900,407 | 900,415 | 9  | 135,060,901 | 135,062,400 | 10q26.3 |  | none            | 67 | 0  | 0  | 0  | 0  | 0  |
| 900,474 | 900,486 | 13 | 135,070,951 | 135,073,050 | 10q26.3 |  | none            | 65 | 0  | 0  | 0  | 0  | 0  |
| 900,492 | 900,504 | 13 | 135,073,651 | 135,075,750 | 10q26.3 |  | none            | 67 | 0  | 0  | 0  | 0  | 0  |
| 900,532 | 900,570 | 39 | 135,079,651 | 135,085,650 | 10q26.3 |  | ADAM8           | 66 | 8  | 0  | 0  | 0  | 0  |
| 900,576 | 900,584 | 9  | 135,086,251 | 135,087,750 | 10q26.3 |  | ADAM8           | 68 | 0  | 0  | 0  | 0  | 0  |
| 900,588 | 900,610 | 23 | 135,088,051 | 135,091,650 | 10q26.3 |  | ADAM8           | 66 | 0  | 1  | 0  | 0  | 0  |
| 900,621 | 900,631 | 11 | 135,093,001 | 135,094,800 | 10q26.3 |  | TUBGCP2         | 62 | 0  | 0  | 0  | 0  | 27 |
| 900,812 | 900,820 | 9  | 135,121,651 | 135,123,150 | 10q26.3 |  | TUBGCP2, ZNF511 | 69 | 0  | 0  | 0  | 0  | 0  |
| 900,923 | 900,931 | 9  | 135,138,301 | 135,139,800 | 10q26.3 |  | CALY            | 71 | 0  | 0  | 0  | 0  | 0  |
| 900,941 | 900,950 | 10 | 135,141,001 | 135,142,650 | 10q26.3 |  | CALY            | 60 | 11 | 0  | 6  | 0  | 0  |
| 900,988 | 901,002 | 15 | 135,148,051 | 135,150,450 | 10q26.3 |  | CALY            | 71 | 0  | 0  | 0  | 0  | 6  |
| 901,071 | 901,078 | 8  | 135,160,501 | 135,161,850 | 10q26.3 |  | PRAP1           | 65 | 0  | 24 | 0  | 0  | 0  |
| 901,088 | 901,097 | 10 | 135,163,051 | 135,164,700 | 10q26.3 |  | PRAP1           | 63 | 0  | 0  | 0  | 0  | 4  |
| 901,125 | 901,142 | 18 | 135,168,601 | 135,171,450 | 10q26.3 |  | none            | 67 | 0  | 0  | 0  | 0  | 0  |
| 901,269 | 901,282 | 14 | 135,190,201 | 135,192,450 | 10q26.3 |  | none            | 65 | 0  | 0  | 5  | 0  | 0  |
| 901,285 | 901,292 | 8  | 135,192,601 | 135,193,950 | 10q26.3 |  | PAOX            | 72 | 0  | 0  | 0  | 0  | 13 |
| 901,547 | 901,554 | 8  | 135,231,901 | 135,233,250 | 10q26.3 |  | MTG1            | 61 | 9  | 0  | 0  | 0  | 0  |
| 901,584 | 901,590 | 7  | 135,237,451 | 135,238,650 | 10q26.3 |  | SPRN            | 73 | 0  | 0  | 0  | 0  | 0  |
| 901,639 | 901,646 | 8  | 135,245,701 | 135,247,050 | 10q26.3 |  | CYP2E1          | 65 | 0  | 0  | 0  | 0  | 0  |
| 901,803 | 901,813 | 11 | 135,270,301 | 135,272,100 | 10q26.3 |  | CYP2E1          | 65 | 0  | 0  | 0  | 9  | 0  |
| 901,817 | 901,823 | 7  | 135,272,401 | 135,273,600 | 10q26.3 |  | CYP2E1          | 70 | 0  | 0  | 0  | 0  | 0  |
| 902,274 | 902,282 | 9  | 135,340,951 | 135,342,450 | 10q26.3 |  | CYP2E1          | 63 | 0  | 0  | 0  | 0  | 0  |

Table S5. Genes Located in Regions Capable of Forming Highly Stable Secondary Structures and Disease Associations

| Gene    | Chromosomal Position | Fragile Site | Insertions, Deletions, and Translocations                                                                                                      | Point Mutations                                                                                                              | Reference*  |
|---------|----------------------|--------------|------------------------------------------------------------------------------------------------------------------------------------------------|------------------------------------------------------------------------------------------------------------------------------|-------------|
| PHYH    | 10p13                |              |                                                                                                                                                | Refsum Disease                                                                                                               | 602026      |
| NMT2    | 10p13                |              | Hypogonadism and Testicular Atrophy                                                                                                            |                                                                                                                              | 603801      |
| VIM     | 10p13                |              |                                                                                                                                                | Cataracts                                                                                                                    | 193060      |
| CACNB2  | 10p12.33             |              |                                                                                                                                                | Brugada Syndrome 4                                                                                                           | 600003      |
| NEBL    | 10p12.31             |              | DiGeorge syndrome-2                                                                                                                            |                                                                                                                              | 605491      |
| BMI1    | 10p12.2              |              |                                                                                                                                                | Hematological Malignancies                                                                                                   | [1]         |
| PTF1A   | 10p12.2              |              |                                                                                                                                                | Diabetes Mellitus, Cerebellar Agenesis                                                                                       | 607194      |
| MAP3K8  | 10p11.23             |              |                                                                                                                                                | Lung Cancer                                                                                                                  | 191195      |
| ZEB1    | 10p11.22             |              |                                                                                                                                                | Corneal Dystrophy                                                                                                            | 189909      |
| RET     | 10q11.21             | FRA10G       | Papillary Thyroid Carcinoma, BCR-ABL(-)<br>Myeloproliferative Disorders, Papillary<br>Thyroid Carcinoma of the Ovary,<br>Hirschprung's Disease | Hirschsprung Disease, Multiple Endocrine<br>Neoplasia, Medullary Thyroid Carcinoma,<br>Pheochromocytoma, Renal Abnormalities | 164761, [1] |
| CXCL12  | 10q11.21             | FRA10G       |                                                                                                                                                | Resistance to AIDS                                                                                                           | 600835      |
| ALOX5   | 10q11.21             | FRA10G       |                                                                                                                                                | Asthma, Atherosclerosis                                                                                                      | 152390      |
| CHAT    | 10q11.23             | FRA10G       |                                                                                                                                                | Myasthenic Syndrome                                                                                                          | 118490      |
| CCDC6   | 10q21.2              | FRA10C       | Papillary Thyroid Carcinoma, BCR-ABL(-)<br>Myeloproliferative Disorders, Chronic<br>Myeloid Leukemia                                           |                                                                                                                              | 601985, [1] |
| RHOBTB1 | 10q21.2              | FRA10C       |                                                                                                                                                | Head and Neck Squamous Cell Carcinoma                                                                                        | [1]         |
| STOX1   | 10q21.3              | FRA10C       |                                                                                                                                                | Preeclampsia                                                                                                                 | 609397      |
| HK1     | 10q22.1              | FRA10D       | Hemolytic Anemia                                                                                                                               |                                                                                                                              | 142600      |
| NEUROG3 | 10q22.1              | FRA10D       |                                                                                                                                                | Diarrhea                                                                                                                     | 604882      |
| PCBD1   | 10q22.1              | FRA10D       |                                                                                                                                                | Hyperphenylalaninemia                                                                                                        | 126090      |
| CDH23   | 10q22.1              | FRA10D       |                                                                                                                                                | Deafness, Usher syndrome                                                                                                     | 605516      |
| CHST3   | 10q22.1              | FRA10D       |                                                                                                                                                | Spondyloepiphyseal Dysplasia                                                                                                 | 603799      |
| KCNMA1  | 10q22.3              |              |                                                                                                                                                | Epilepsy                                                                                                                     | 600150      |
| ZMIZ1   | 10q22.3              |              | B-Cell Acute Lymphoblastic Leukemia                                                                                                            |                                                                                                                              | [2]         |
| CDHR1   | 10q23.1              |              |                                                                                                                                                | Cone-Rod Dystrophy 15                                                                                                        | 609502      |
| LDB3    | 10q23.2              |              |                                                                                                                                                | Cardiomyopathy, Myofibrillar Myopathy                                                                                        | 605906      |
| BMPR1A  | 10q23.2              |              | Juvenile Polyposis Syndrome                                                                                                                    | Juvenile Polyposis Syndrome                                                                                                  | 601299      |
| GLUD1   | 10q23.2              |              |                                                                                                                                                | Hyperinsulinism-Hyperammonemia<br>Syndrome                                                                                   | 138130      |

|         |          |        |                                                                                                                        |                                                                                                                                                                                                              |             |
|---------|----------|--------|------------------------------------------------------------------------------------------------------------------------|--------------------------------------------------------------------------------------------------------------------------------------------------------------------------------------------------------------|-------------|
| PTEN    | 10q23.31 | FRA10A | Bannayan-Riley-Ruvalcaba Syndrome; Endometrial, Prostate, Breast, Cervical, Squamous Cell, and Head and Neck Carcinoma | Malignant Melanom; Cowden Disease; Bannayan-Riley-Ruvalcaba, Lhermitte-Duclos, and Macrocephaly/Autism Syndromes                                                                                             | 601728      |
| RBP4    | 10q23.33 | FRA10A |                                                                                                                        | Retinol-Binding Protein Deficiency                                                                                                                                                                           | 180250      |
| HPS1    | 10q24.2  | FRA10A | Hermansky-Pudlak Syndrome 1                                                                                            |                                                                                                                                                                                                              | 604982      |
| ABCC2   | 10q24.2  | FRA10A | Dubin-Johnson Syndrome                                                                                                 | Dubin-Johnson Syndrome                                                                                                                                                                                       | 601107      |
| PAX2    | 10q24.31 |        | Papillorenal Syndrome                                                                                                  | Papillorenal Syndrome, Isolated Renal Hypoplasia                                                                                                                                                             | 167409      |
| PDZD7   | 10q24.31 |        | Usher Syndrome                                                                                                         |                                                                                                                                                                                                              | 612971      |
| FGF8    | 10q24.32 |        |                                                                                                                        | Kallmann Syndrome 6                                                                                                                                                                                          | 600483      |
| HPS6    | 10q24.32 |        | Hermansky-Pudlak Syndrome 6                                                                                            | Hermansky-Pudlak Syndrome 6                                                                                                                                                                                  | 607522      |
| PITX3   | 10q24.32 |        | Anterior Segment Mesenchymal Dysgenesis, Cataracts                                                                     | Cataracts                                                                                                                                                                                                    | 602669      |
| NFKB2   | 10q24.32 |        | Hematological Malignancies                                                                                             |                                                                                                                                                                                                              | 164012, [1] |
| CNNM2   | 10q24.32 |        | Renal Hypomagnesemia 6                                                                                                 | Renal Hypomagnesemia 6                                                                                                                                                                                       | 607803      |
| COL17A1 | 10q24.33 |        | Epidermolysis Bullosa                                                                                                  | Epidermolysis Bullosa                                                                                                                                                                                        | 113811      |
| ADD3    | 10q25.1  |        | T-cell Acute Lymphoblastic Leukemia                                                                                    |                                                                                                                                                                                                              | 601568      |
| ADRB1   | 10q25.3  |        | Congestive Heart Failure                                                                                               | Congestive Heart Failure                                                                                                                                                                                     | 109630      |
| BAG3    | 10q26.11 | FRA10F | Dilated Cardiomyopathy 1HH                                                                                             | Myofibrillar Myopathy, Dilated Cardiomyopathy 1HH                                                                                                                                                            | 603883      |
| FGFR2   | 10q26.13 | FRA10F | Saethre-Chotzen, Apert, Pfeiffer, LADD, and Beare-Stevenson Cutis Gyrata Syndromes                                     | Endometrial, Gastric, Lung, Breast, and Ovarian Cancers; Crouzon, Pfeiffer, Jackson-Weiss, Antley-Bixler, Beare-Stevenson Cutis Gyrata, Apert, and LADD Syndromes; Craniosynostosis; Axenfeld-Rieger Anomaly | 176943, [1] |
| PLEKHA1 | 10q26.13 | FRA10F |                                                                                                                        | Age-Related Maculopathy                                                                                                                                                                                      | 607772      |
| HTRA1   | 10q26.13 | FRA10F |                                                                                                                        | Age-related Macular Degeneration, Cerebral Autosomal Recessive Arteriopathy with Subcortical Infarcts and Leukoencephalopathy                                                                                | 602194      |
| OAT     | 10q26.13 | FRA10F | Gyrate Atrophy of the Choroid and Retina                                                                               | Gyrate Atrophy of the Choroid and Retina                                                                                                                                                                     | 613349      |
| ADAM12  | 10q26.2  |        |                                                                                                                        | Breast Cancer                                                                                                                                                                                                | [1]         |

\*Reference numbers refer to Online Mendelian Inheritance in Man entries. URL [www.omim.org](http://www.omim.org)

[1] Atlas of Genetics and Cytogenetics in Oncology and Haematology. URL <http://AtlasGeneticsOncology.org>

[2] Soler, G. *et al.* (2008) *Leukemia*, **22**, 1278-1280.

Table S6. Copy Number Alterations That Overlap With Regions of Predicted High Levels of DNA Secondary Structure.

| <b>Cancer</b>     | <b>Type</b>   | <b>Nucleotide Start*</b> | <b>Nucleotide End*</b> | <b>Segment Start</b> | <b>Segment End</b> |
|-------------------|---------------|--------------------------|------------------------|----------------------|--------------------|
| <b>Glioma</b>     | Deletion      | 89,505,798               | 90,410,621             | 596,704              | 602,738            |
| <b>Glioma</b>     | Deletion      | 116,731,800              | 130,571,762            | 778,211              | 870,479            |
| <b>Breast</b>     | Amplification | 79,120,871               | 81,735,347             | 527,471              | 544,903            |
| <b>Breast</b>     | Amplification | 123,214,869              | 123,367,187            | 821,431              | 822,448            |
| <b>Breast</b>     | Amplification | 101,955                  | 12,088,176             | 678                  | 80,588             |
| <b>Breast</b>     | Deletion      | 89,505,798               | 90,410,621             | 596,704              | 602,738            |
| <b>Breast</b>     | Deletion      | 100,166,329              | 135,071,762            | 667,774              | 900,479            |
| <b>Breast</b>     | Deletion      | 19,022,250               | 42,889,659             | 126,814              | 285,932            |
| <b>Colorectal</b> | Deletion      | 86,049,212               | 120,513,596            | 573,660              | 803,424            |
| <b>Colorectal</b> | Deletion      | 121,281,931              | 133,627,776            | 808,545              | 890,852            |
| <b>Colorectal</b> | Deletion      | 101,955                  | 12,248,313             | 678                  | 81,656             |
| <b>Lung NSC</b>   | Deletion      | 52,319,777               | 53,165,029             | 348,797              | 354,434            |
| <b>Lung NSC</b>   | Deletion      | 101,955                  | 1,001,958              | 678                  | 6,680              |
| <b>Lung NSC</b>   | Deletion      | 104,446,715              | 135,071,762            | 696,310              | 900,479            |
| <b>Melanoma</b>   | Deletion      | 89,308,314               | 90,410,621             | 595,387              | 602,738            |
| <b>Melanoma</b>   | Deletion      | 129,149,375              | 135,071,762            | 860,994              | 900,479            |
| <b>Melanoma</b>   | Deletion      | 54,201,467               | 57,779,853             | 361,342              | 385,200            |
| <b>Ovarian</b>    | Amplification | 75,589,696               | 80,443,337             | 503,930              | 536,289            |
| <b>Prostate</b>   | Amplification | 74,192,290               | 82,019,313             | 494,614              | 546,796            |
| <b>Prostate</b>   | Amplification | 61,909,390               | 66,364,553             | 412,728              | 442,431            |
| <b>Prostate</b>   | Deletion      | 101,955                  | 44,811,377             | 678                  | 298,743            |

\*Location of deletions and amplifications obtained from Tumorscape ([www.broadinstitute.org/tumorscape](http://www.broadinstitute.org/tumorscape)) and based on human genome build hg37.2
